# Supplementary material
Source: publisher figshare collection journal article supplement (https://acs.figshare.com/ndownloader/files/4146682)

# Supporting Information

## “Customizable” Units in Di- and tripeptides: Selective Conversion into Substituted Dehydroamino Acids

Carlos J. Saavedra, Alicia Boto,\* and Rosendo Hernández\*

Instituto de Productos Naturales y Agrobiología CSIC, Avda. Astrofísico Fco. Sánchez 3, 38206-La Laguna, Tenerife, Spain

[alicia@ipna.csic.es](mailto:alicia@ipna.csic.es); [rhernandez@ipna.csic.es](mailto:rhernandez@ipna.csic.es)

**Supporting Information.** Procedures for the synthesis of the substrates for the scission-phosphorylation process **4**, **5** and **17** (pp 1–2), study of the scission–oxidation reaction and formation of the  $\alpha$ -methoxyglycine derivatives **4**, **5** and **11** (pp 2–3), procedure for the phosphorylation reaction and synthesis of phosphorylated compounds **7**, **12** and **18** (pp 2–4), procedures for the Horner-Wadsworth-Emmons Reaction and preparation of dehydroamino acid-containing peptides **8**, **9**, **13–16** and **19** (pp 4–7).  $^1\text{H}$  and  $^{13}\text{C}$  NMR spectra of compounds **4–9** and **11–19** and NOE experiments for compounds **8**, **13**, **14**, **16** and **19**. (pp 8–27). This material is available free of charge via the Internet at <http://pubs.acs.org>.

**General Methods.** Melting points were determined with a hot-stage apparatus and are uncorrected. Optical rotations were measured at the sodium line at ambient temperature (26 °C) in  $\text{CHCl}_3$  solutions. NMR spectra were determined at 500 MHz for  $^1\text{H}$  and 125.7 or 100 MHz for  $^{13}\text{C}$  in the presence of TMS as internal standard, unless otherwise stated. Mass spectra were determined at 70 eV. Merck silica gel 60  $\text{PF}_{254}$  and 60 (0.063–0.2 mm) were used for preparative thin layer chromatography and column chromatography, respectively. All reactions involving air- or moisture-sensitive materials were carried out under a nitrogen atmosphere. The reagent for TLC analysis was  $\text{KMnO}_4$  in  $\text{NaOH}/\text{K}_2\text{CO}_3$  aqueous solution and the TLC was heated until development of color.

### Preparation of Substrates **4**, **5** and **17**.

**Scheme 1.** Preparation of substrates **4** and **5**

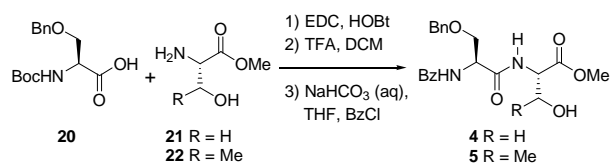

**N-(O-Benzyl-N-benzoyl-L-seryl)-L-serine Methyl Ester (**4**).** To a solution of Boc-Ser(OBn)-OH (**20**) (2.96 g, 10 mmol) and H-Ser-OMe•HCl (**21**) (1.56 g, 10 mmol) in dry  $\text{CH}_2\text{Cl}_2$  (100 mL) at 0 °C, was added diisopropylethylamine (3.4 mL, 2.59 g, 20 mmol), 1-hydroxybenzotriazol hydrate (HOBt) (1.49 g, 11 mmol), and N-(3-dimethylaminopropyl)-N-ethylcarbodiimide hydrochloride (EDC, 2.1 g, 11 mmol). The reaction mixture was stirred for 2 h at 0 °C, then was allowed to reach room temperature (26 °C) and stirred for 18 h. Then it was poured into saturated aqueous  $\text{NaHCO}_3$  and extracted with  $\text{CH}_2\text{Cl}_2$ . The organic layer was dried on sodium sulfate, filtered and evaporated under vacuum. The residue was dissolved in 1:1 TFA: $\text{CH}_2\text{Cl}_2$  (25 mL) and the solution was stirred at 26 °C for 1.5 h. Then the solvent was removed under vacuum and the residue was dissolved in THF (15 mL). Then saturated aqueous  $\text{NaHCO}_3$  (15 mL) was added, the mixture was cooled to 0 °C, and benzoyl chloride was added dropwise (1.51 mL, 1.83 g, 13 mmol). After stirring for 16 h, the mixture was poured into 5% aqueous HCl at 0 °C and extracted with EtOAc. The residue was purified by column chromatography (hexanes/EtOAc, 30:70), to give compound **4** (2.68 g, 67%) as a syrup;  $[\alpha]_D^{+51}$  (c 0.34,  $\text{CHCl}_3$ ); IR ( $\text{CHCl}_3$ )  $\nu_{\text{max}}$ : 3418, 1747, 1679, 1660, 1512  $\text{cm}^{-1}$ .  $^1\text{H}$  NMR (500 MHz,  $\text{CDCl}_3$ ):  $\delta_{\text{H}}$  3.05 (1H, brb),

3.70 (1H, dd,  $J = 6.9, 9.5$  Hz), 3.75 (3H, s), 3.90–3.98 (2H, m), 3.99 (1H, dd,  $J = 4.4, 9.2$  Hz), 4.60 (2H, s), 4.66 (1H, ddd,  $J = 3.8, 3.8, 7.3$  Hz), 4.84 (1H, ddd,  $J = 4.7, 6.6, 6.9$  Hz), 7.17 (1H, brd,  $J = 6.6$  Hz), 7.28 (1H, m), 7.31–7.35 (4H, m), 7.42 (2H, dd,  $J = 7.3, 7.9$  Hz), 7.51 (1H, dd,  $J = 7.8, 7.9$  Hz), 7.53 (1H, d,  $J = 7.6$  Hz), 7.77 (2H, d,  $J = 7.3$  Hz);  $^{13}\text{C}$  NMR (100.6 MHz,  $\text{CDCl}_3$ ):  $\delta_{\text{C}}$  52.7 ( $\text{CH}_3$ ), 53.2 ( $\text{CH}$ ), 55.1 ( $\text{CH}$ ), 62.8 ( $\text{CH}_2$ ), 69.5 ( $\text{CH}_2$ ), 73.6 ( $\text{CH}_2$ ), 127.2 ( $2 \times \text{CH}$ ), 127.9 ( $2 \times \text{CH}$ ), 128.0 ( $\text{CH}$ ), 128.5 ( $2 \times \text{CH}$ ), 128.6 ( $2 \times \text{CH}$ ), 131.9 ( $\text{CH}$ ), 133.5 ( $\text{C}$ ), 137.3 ( $\text{C}$ ), 167.6 ( $\text{C}$ ), 170.3 ( $\text{C}$ ), 170.5 ( $\text{C}$ ); HRMS calcd for  $\text{C}_{20}\text{H}_{22}\text{N}_2\text{O}_5$  ( $\text{M}^+ + \text{H} - \text{OMe}$ ), 370.1529; found, 370.1513. Anal. calcd for  $\text{C}_{21}\text{H}_{24}\text{N}_2\text{O}_6$  C 62.99, H 6.04, N 7.00; found C 62.73, H 6.13, N 7.10.

***N*-(*O*-Benzyl-*N*-benzoyl-*L*-seryl)-*L*-threonine Methyl Ester (5).** Obtained from commercial Boc-Ser(OBn)-OH (20) (2.95 g, 10 mmol) and H-Thr-OMe•HCl (27) (1.70 g, 10 mmol) as described before for the synthesis of dipeptide 4. After purification by column chromatography (hexanes/EtOAc, 30:70), dipeptide 5 was isolated (3.31 g, 80%) as a syrup;  $[\alpha]_{\text{D}}^{25} +34$  ( $c$  0.23,  $\text{CHCl}_3$ ); IR ( $\text{CHCl}_3$ )  $\nu_{\text{max}}$  3419, 1747, 1680, 1660, 1653, 1511  $\text{cm}^{-1}$ ;  $^1\text{H}$  NMR (500 MHz,  $\text{CDCl}_3$ ):  $\delta_{\text{H}}$  1.19 (3H, d,  $J = 6.3$  Hz), 3.70 (1H, m), 3.72 (3H, s), 3.99 (1H, dd,  $J = 4.4, 9.1$  Hz), 4.34 (1H, m), 4.59–4.62 (3H, m), 4.91 (1H, m), 7.22 (1H, brb), 7.28 (1H, m), 7.29–7.38 (4H, m), 7.41 (2H, dd,  $J = 7.6, 7.9$  Hz), 7.48 (1H, brb), 7.50 (1H, dd,  $J = 7.3, 7.6$  Hz), 7.79 (2H, d,  $J = 6.9$  Hz);  $^{13}\text{C}$  NMR (125.7 MHz,  $\text{CDCl}_3$ ):  $\delta_{\text{C}}$  19.9 ( $\text{CH}_3$ ), 52.5 ( $\text{CH}_3$ ), 53.0 ( $\text{CH}$ ), 57.7 ( $\text{CH}$ ), 67.9 ( $\text{CH}$ ), 69.6 ( $\text{CH}_2$ ), 73.5 ( $\text{CH}_2$ ), 127.1 ( $2 \times \text{CH}$ ), 127.9 ( $3 \times \text{CH}$ ), 128.4 ( $2 \times \text{CH}$ ), 128.6 ( $2 \times \text{CH}$ ), 131.9 ( $\text{CH}$ ), 133.5 ( $\text{C}$ ), 137.3 ( $\text{C}$ ), 167.5 ( $\text{C}$ ), 170.7 ( $\text{C}$ ), 171.0 ( $\text{C}$ ); HRMS calcd for  $\text{C}_{21}\text{H}_{22}\text{N}_2\text{O}_5$  ( $\text{M}^+ - \text{HOMe}$ ), 382.1529; found, 382.1512. Anal. calcd for  $\text{C}_{22}\text{H}_{26}\text{N}_2\text{O}_6$  C 63.76, H 6.32, N 6.76; found C 63.67, H 6.27, N 6.73.

**Scheme 2.** Preparation of substrate 17

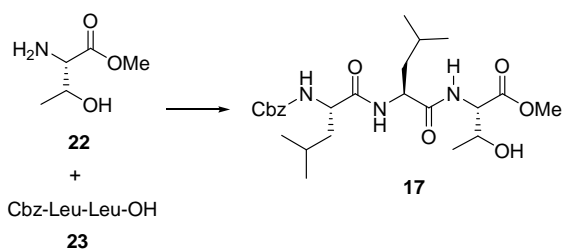

***N*-(*N*-Benzyloxycarbonyl-*L*-leucyl-*L*-leucyl)-*L*-threonine Methyl Ester (17).** Obtained from commercial H-Thr-OMe•HCl (22) (1.70 g, 10 mmol) and Cbz-Leu-Leu-OH (23) (3.78 g, 10 mmol) as described before for the synthesis of dipeptide 4. After purification by column chromatography (hexanes/EtOAc, 40:60), tripeptide 17 was isolated (3.95 g, 80%) as a syrup;  $[\alpha]_{\text{D}}^{25} -48$  ( $c$  0.23,  $\text{CHCl}_3$ ); IR ( $\text{CHCl}_3$ )  $\nu_{\text{max}}$  3425, 1731, 1673, 1508  $\text{cm}^{-1}$ ;  $^1\text{H}$  NMR (500 MHz,  $\text{CDCl}_3$ ):  $\delta_{\text{H}}$  0.89–0.93 (12H, m),

1.17 (3H, d,  $J = 6.3$  Hz), 1.49–1.75 (6H, m), 3.75 (3H, s), 4.19 (1H, m), 4.29 (1H, m), 4.52 (1H, ddd,  $J = 6.3, 7.9, 8.2$  Hz), 4.58 (1H, br d,  $J = 7.5$  Hz), 5.06 (1H, d,  $J = 13.0$  Hz), 5.11 (1H, d,  $J = 12.0$  Hz), 5.46 (1H, d,  $J = 6.6$  Hz), 6.59 (1H, br b), 7.13 (1H, br b), 7.30–7.40 (5H, m);  $^{13}\text{C}$  NMR (125.7 MHz,  $\text{CDCl}_3$ ):  $\delta_{\text{C}}$  19.7 ( $\text{CH}_3$ ), 22.0 ( $\text{CH}_3$ ), 22.3 ( $\text{CH}_3$ ), 22.5 ( $\text{CH}_3$ ), 22.8 ( $\text{CH}_3$ ), 24.5 ( $\text{CH}$ ), 24.6 ( $\text{CH}$ ), 40.7 ( $\text{CH}_2$ ), 41.1 ( $\text{CH}_2$ ), 52.2 ( $\text{CH}$ ), 52.5 ( $\text{CH}_3$ ), 53.5 ( $\text{CH}$ ), 57.6 ( $\text{CH}$ ), 67.0 ( $\text{CH}_2$ ), 68.3 ( $\text{CH}$ ); 128.0 ( $2 \times \text{CH}$ ), 128.1 ( $\text{CH}$ ), 128.5 ( $2 \times \text{CH}$ ), 136.1 ( $\text{C}$ ), 156.4 ( $\text{C}$ ), 171.2 ( $\text{C}$ ), 172.4 ( $\text{C}$ ), 173.0 ( $\text{C}$ ); HRMS calcd for  $\text{C}_{22}\text{H}_{31}\text{N}_3\text{O}_7$  ( $\text{M}^+ - \text{H} - \text{CHMe}_2$ ), 449.2162; found, 449.2173. Anal. calcd for  $\text{C}_{25}\text{H}_{39}\text{N}_3\text{O}_7$  C 60.83, H 7.96, N 8.51; found C 60.74, H 7.75, N 8.61.

### Study of the scission–oxidation reaction.

**Scheme 3.** Preparation of the  $\alpha$ -methoxyglycine derivative 6

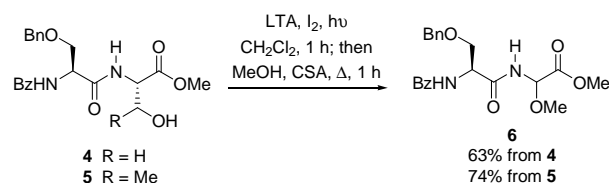

**Procedure for the Radical Scission–Oxidation –Addition of *O*-Nucleophiles Process: Synthesis of *N*-(*O*-Benzyl-*N*-benzoyl-*L*-seryl)-2-(methoxy)glycine Methyl Ester (6).** To a solution of Bz-Ser(Bn)-Ser-OMe (4) (80 mg, 0.2 mmol) or Bz-Ser(Bn)-Thr-OMe (5) (83 mg, 0.2 mmol) in dry dichloromethane (8 mL) was added iodine (51 mg, 0.2 mmol) and lead tetraacetate (LTA, 178 mg, 0.4 mmol). The reaction mixture was stirred for 1 h at room temperature (26 °C) under irradiation with visible light (80-W tungsten-filament lamp). Then the reaction mixture was poured into 10% aqueous  $\text{Na}_2\text{S}_2\text{O}_3$  and extracted with  $\text{CH}_2\text{Cl}_2$ . The organic layer was dried over sodium sulfate, filtered, and the solvent was removed under vacuum. The residue was dissolved in dry methanol (8 mL), and camphorsulfonic acid (CSA) was added (139 mg, 0.6 mmol). The mixture was stirred for 1 h at reflux temperature; then was cooled to 26 °C, poured into water and extracted with dichloromethane. The organic layer was dried and filtered as before. The solvent was removed under vacuum and the residue was purified by chromatography on silica gel (hexanes/EtOAc 60:40), to afford product 6 (50 mg, 63% from substrate 4; 59 mg, 74% from substrate 5) as a 1:1 diastereomer mixture. Syrup; IR ( $\text{CHCl}_3$ )  $\nu_{\text{max}}$  3420, 1753, 1691, 1660, 1508, 1482  $\text{cm}^{-1}$ ;  $^1\text{H}$  NMR (500 MHz,  $\text{CDCl}_3$ ):  $\delta_{\text{H}}$  3.41/3.42 (3H, s/s), 3.65/3.71 (1H, m), 3.75 (3H, s), 4.02/4.04 (1H, [dd,  $J = 4.1, 6.3$  Hz/ dd,  $J = 4.1, 6.3$  Hz]), 4.57/4.59 (1H, [d,  $J = 12$  Hz/ d,  $J = 11.3$  Hz]), 4.62/4.64 (1H, [d,  $J = 12$  Hz/ d,  $J = 11.9$  Hz]), 4.89 (1H, m), 5.57/5.59 (1H, [d,  $J = 5.7$  Hz/ d,  $J = 5.9$  Hz]), 7.15 (1H, d,  $J = 6.6$  Hz), 7.28

(1H, m), 7.30–7.35 (4H, m), 7.42 (2H, dd,  $J = 7.3, 7.9$  Hz), 7.51 (1H, dd,  $J = 7.3, 7.6$  Hz), 7.58/7.70 (1H, [d,  $J = 9.1$  Hz/ d,  $J = 8.8$  Hz]), 7.79 (2H, d,  $J = 8.0$  Hz);  $^{13}\text{C}$  NMR (125.7 MHz,  $\text{CDCl}_3$ ):  $\delta_{\text{C}}$  52.8 ( $\text{CH}_3$ ), 52.96/53.03 (CH), 56.4/56.5 ( $\text{CH}_3$ ), 69.16/69.21 ( $\text{CH}_2$ ), 73.6 ( $\text{CH}_2$ ), 78.3/78.4 (CH), 127.1 ( $2 \times \text{CH}$ ), 127.8 ( $2 \times \text{CH}$ ), 128.0 (CH), 128.5 ( $2 \times \text{CH}$ ), 128.6 ( $2 \times \text{CH}$ ), 131.9 (CH), 133.4 (C), 137.08/137.12 (C), 167.3 (C), 167.8 (C), 170.9/171.0 (C); HRMS (EI) calcd for  $\text{C}_{21}\text{H}_{24}\text{N}_2\text{O}_6$  ( $\text{M}^+$ ) 400.1634; found, 400.1622. Anal. calcd for  $\text{C}_{21}\text{H}_{24}\text{N}_2\text{O}_6$  C 62.99, H 6.04, N 7.00; found C 62.64, H 6.06, N 6.92.

**Scheme 4.** Preparation of  $\alpha$ -methoxyglycine Derivative **11**

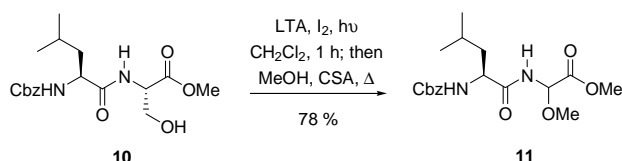

***N*-(*N*-Benzyloxycarbonyl-L-leucyl)-2-(methoxy)glycine Methyl Ester (**11**).** Obtained from commercial Cbz-Leu-Ser-OMe (**10**) (73 mg, 0.2 mmol) as described for the  $\alpha$ -methoxyglycine derivative **6**. Usual work-up and purification by column chromatography (hexanes-EtOAc 60:40) gave the methoxy derivative **11** (57 mg, 78%) as a 10:7 diastereomer mixture. White solid; m.p. 109–110 °C (EtOAc/hexane). IR ( $\text{CHCl}_3$ )  $\nu_{\text{max}}$  3423, 1751, 1719, 1697, 1504  $\text{cm}^{-1}$ ;  $^1\text{H}$  NMR (500 MHz,  $\text{CDCl}_3$ ):  $\delta_{\text{H}}$  0.92 (3H, d,  $J = 6.3$  Hz), 0.93 (3H, d,  $J = 6.4$  Hz), 1.53 (1H, m), 1.60–1.74 (2H, m), 3.38/3.40 (3H, s/s), 3.76/3.77 (3H, s/s), 4.31 (1H, m), 5.08 (1H, d,  $J = 14$  Hz), 5.12 (1H, d,  $J = 14.5$  Hz), 5.44/5.47 (1H, [d,  $J = 7.9$  Hz/ d,  $J = 8.2$  Hz]), 5.52/5.53 (1H, [d,  $J = 8.8$  Hz/ d,  $J = 9.1$  Hz]), 7.26–7.32 (6H, m);  $^{13}\text{C}$  NMR (125.7 MHz,  $\text{CDCl}_3$ ):  $\delta_{\text{C}}$  21.7/21.8 ( $\text{CH}_3$ ), 22.8/22.9 ( $\text{CH}_3$ ), 24.6/24.7 (CH), 41.3/41.4 ( $\text{CH}_2$ ), 52.8 ( $\text{CH}_3$ ), 53.7 (CH), 56.4/56.5 ( $\text{CH}_3$ ), 67.1 ( $\text{CH}_2$ ), 78.3 (CH), 128.0 ( $2 \times \text{CH}$ ), 128.1 (CH), 128.5 ( $2 \times \text{CH}$ ), 136.1 (C), 156.2 (C), 168.2 (C), 173.2 (C). HRMS (EI) calcd for  $\text{C}_{16}\text{H}_{23}\text{N}_2\text{O}_4$  ( $\text{M}^+ - \text{CO}_2\text{Me}$ ) 307.1664; found, 307.1658. Anal. calcd for  $\text{C}_{18}\text{H}_{26}\text{N}_2\text{O}_6$  C 59.00, H 7.15, N 7.65; found C 58.71, H 7.07, N 7.86.

#### Study of the Phosphorylation Reaction.

**Scheme 5.** Synthesis of the phosphorylation product **7**

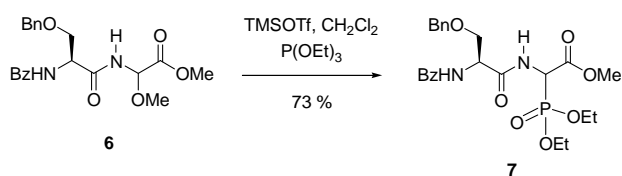

**General Procedure for the Phosphorylation Reaction.** To a solution of the methoxy derivative (0.2

mmol) in  $\text{CH}_2\text{Cl}_2$  (8 mL) at 0 °C was added triethylphosphite (174  $\mu\text{L}$ , 166 mg, 1 mmol) and TMSOTf (109  $\mu\text{L}$ , 133 mg, 0.6 mmol). The reaction mixture was stirred for 3 h, then it was poured into saturated aqueous  $\text{NaHCO}_3$  and extracted with  $\text{CH}_2\text{Cl}_2$ . The organic layer was dried and evaporated as usual, and the residue was purified by chromatography on silica gel (hexanes/EtOAc), to afford the  $\alpha$ -aminophosphonate derivatives.

#### ***N*-(*N*-Benzoyl-*O*-benzyl-L-seryl)-2-(diethoxyphosphoryl)glycine Methyl Ester (**7**).**

Obtained from compound **6** (80 mg, 0.2 mmol) according to the General Procedure for the phosphorylation reaction. After purification by rotatory chromatography (hexanes/EtOAc 50:50), compound **7** was isolated as a 1:1 diastereomer mixture (74 mg, 73%): Syrup; IR ( $\text{CHCl}_3$ )  $\nu_{\text{max}}$  3419, 1748, 1684, 1660, 1508  $\text{cm}^{-1}$ ;  $^1\text{H}$  NMR (500 MHz,  $\text{CDCl}_3$ , 26 °C):  $\delta_{\text{H}}$  1.20–1.35 (6H, m), 3.64/3.68 (1H, dd,  $J = 7.9, 9.5$  Hz/dd,  $J = 7.3, 9.8$  Hz), 3.79/3.80 (3H, s/s), 4.04/4.05 (1H, dd,  $J = 4.0, 9.3$  Hz/dd,  $J = 4.0, 9.5$  Hz), 4.08–4.20 (4H, m), 4.60 (1H, d,  $J = 11.9$  Hz), 4.65 (1H, d,  $J = 11.9$  Hz), 4.88 (1H, m), 5.16/5.20 (1H, dd,  $J = 8.0, 21.8$  Hz/ dd,  $J = 7.3, 20.5$  Hz), 7.14/7.15 (1H, d,  $J = 7.0, 7.3$  Hz), 7.30–7.40 (5H, m), 7.42 (2H, dd,  $J = 7.6, 7.9$  Hz), 7.51 (1H, dd,  $J = 7.6, 7.9$  Hz), 7.63/7.64 (1H, d,  $J = 8.8$  Hz/d,  $J = 8.9$  Hz), 7.80/7.81 (2H, brd,  $J = 8.0$  Hz/brd,  $J = 8.5$  Hz);  $^{13}\text{C}$  NMR (125.7 MHz,  $\text{CDCl}_3$ , 26 °C):  $\delta_{\text{C}}$  16.2 ( $2 \times \text{CH}_3$ , d,  $J_{\text{C,P}} = 5.7$  Hz), 50.95/51.00 (CH, d,  $J_{\text{C,P}} = 147.2$  Hz), 52.5/52.8 (CH), 53.2 ( $\text{CH}_3$ ), 63.8 ( $\text{CH}_2$ , d,  $J_{\text{C,P}} = 7.4$  Hz), 63.9 ( $\text{CH}_2$ , d,  $J_{\text{C,P}} = 7.4$  Hz), 69.2 ( $\text{CH}_2$ ), 73.5/73.6 ( $\text{CH}_2$ ), 127.1 ( $2 \times \text{CH}$ ), 127.8 (CH), 127.9 ( $2 \times \text{CH}$ ), 128.5 ( $2 \times \text{CH}$ ), 128.6 ( $2 \times \text{CH}$ ), 131.9 (CH), 133.5 (C), 137.1/137.2 (C), 166.8 (C), 167.2/167.3 (C), 169.8/170.2 (C, d,  $J_{\text{C,P}} = 6.4$  Hz); HRMS calcd for  $\text{C}_{24}\text{H}_{31}\text{N}_2\text{O}_8\text{P}$  [ $\text{M}^+$ ], 506.1818; found, 506.1831.

**Scheme 6.** Synthesis of the phosphorylation product **12**

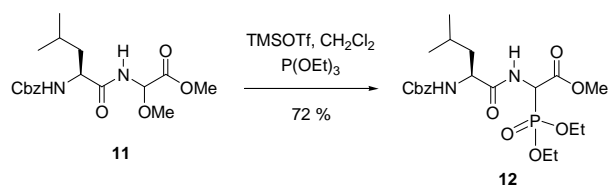

#### ***N*-(*N*-Benzyloxycarbonyl-L-leucyl)-2-(diethoxyphosphoryl)glycine Methyl Ester (**20**).**

Obtained from compound **11** (73 mg, 0.2 mmol) according to the General Procedure for the phosphorylation reaction. After purification by rotatory chromatography (hexanes/EtOAc 50:50), compound **12** (68 mg, 72%) was isolated as a 1:1 diastereomer mixture: Syrup; IR ( $\text{CHCl}_3$ )  $\nu_{\text{max}}$  3429, 1746, 1719, 1688, 1507  $\text{cm}^{-1}$ ;  $^1\text{H}$  NMR (500 MHz,  $\text{CDCl}_3$ , 26 °C):  $\delta_{\text{H}}$  0.92 (6H, d,  $J = 6.3$  Hz), 1.25–1.32 (6H, m), 1.51 (1H, m), 1.60–1.73 (2H, m), 3.77 (3H, s), 4.05–4.20 (4H, m), 4.34 (1H, m),

5.09 (2H, s), 5.15/5.17 (1H, [dd,  $J = 8.8$  Hz,  $J_{\text{H,P}} = 22.4$  Hz/ dd,  $J = 8.9$  Hz,  $J_{\text{H,P}} = 22.3$  Hz]), 5.47 (1H, br b), 7.20 (1H, br d,  $J = 7.9$  Hz), 7.28–7.35 (5H, m).  $^{13}\text{C}$  NMR (100.6 MHz,  $\text{CDCl}_3$ , 26 °C):  $\delta_{\text{C}}$  16.2 (2  $\times$   $\text{CH}_3$ , d,  $J_{\text{C,P}} = 5.7$  Hz), 21.8 ( $\text{CH}_3$ ), 22.8 ( $\text{CH}_3$ ), 24.6 ( $\text{CH}$ ), 41.5 ( $\text{CH}_2$ ), 50.6 ( $\text{CH}$ , d,  $J_{\text{C,P}} = 147.9$  Hz), 52.97/53.03 ( $\text{CH}_3$ ), 53.44/53.51 ( $\text{CH}$ ), 63.7 ( $\text{CH}_2$ , d,  $J_{\text{C,P}} = 7.0$  Hz), 63.9 ( $\text{CH}_2$ , d,  $J_{\text{C,P}} = 5.2$  Hz), 67.0 ( $\text{CH}_2$ ), 127.9 ( $\text{CH}$ ), 128.1 (2  $\times$   $\text{CH}$ ), 128.5 (2  $\times$   $\text{CH}$ ), 136.2 (C), 156.0 (C), 166.9 (C), 172.1 (C); HRMS calcd for  $\text{C}_{21}\text{H}_{33}\text{N}_2\text{O}_8\text{P}$  [ $\text{M}^+$ ], 472.1975; found, 472.1978.

**Scheme 7.** Simplified procedure for the preparation of the scission-phosphorylation product **12**

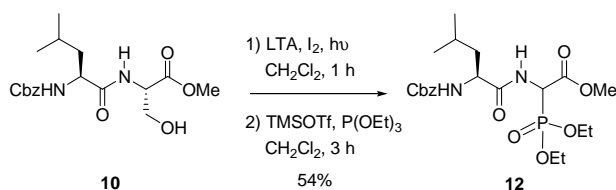

**General Procedure for the Simplified Scission–Phosphorylation Process.** To a solution of the starting material (0.2 mmol) in dry dichloromethane (8 mL) was added iodine (51 mg, 0.2 mmol) and lead tetraacetate (LTA, 178 mg, 0.4 mmol). The reaction mixture was stirred for 1 h at room temperature (26 °C) under irradiation with visible light (80-W tungsten-filament lamp). Then the reaction mixture was poured into 10% aqueous  $\text{Na}_2\text{S}_2\text{O}_3$  and extracted with  $\text{CH}_2\text{Cl}_2$ , and the solvent was dried and evaporated as usual. The unpurified residue was dissolved in dry  $\text{CH}_2\text{Cl}_2$  (8 mL), the solution was cooled to 0 °C and triethylphosphite (174  $\mu\text{L}$ , 166 mg, 1 mmol) and TMSOTf (109  $\mu\text{L}$ , 133 mg, 0.6 mmol) were added. The reaction mixture was stirred for 3 h, then it was poured into saturated aqueous  $\text{NaHCO}_3$  and extracted with  $\text{CH}_2\text{Cl}_2$ . After usual solvent drying and evaporation, the residue was purified by chromatography on silica gel (hexanes/EtOAc), to afford the  $\alpha$ -aminophosphonate derivatives.

***N*-(*N*-Benzyloxycarbonyl-L-leucyl)-2-(diethoxy phosphoryl)glycine Methyl Ester (**12**).** Obtained from Cbz-Leu-Ser-OMe (**10**) (73 mg, 0.2 mmol) according to the General Procedure for the scission-phosphorylation reaction. After purification by rotatory chromatography (hexanes/EtOAc 50:50), compound **12** (67 mg, 71%) was isolated as a 1:1 diastereomer mixture.

**Scheme 8.** Synthesis of the scission–phosphorylation **18**

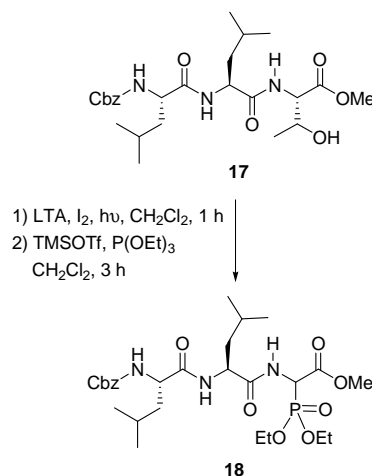

***N*-(*N*-Benzyloxycarbonyl-L-leucyl)-2-(diethoxy phosphoryl)glycine Methyl Ester (**18**).** Obtained from compound **17** (80 mg, 0.2 mmol) according to the Simplified Scission–Phosphorylation Procedure. After purification by rotatory chromatography (hexanes/EtOAc 40:60), compound **18** was isolated as a 1:1 diastereomer mixture (71 mg, 61%): Syrup; IR ( $\text{CHCl}_3$ )  $\nu_{\text{max}}$  3426, 3318, 1747, 1712, 1678, 1506  $\text{cm}^{-1}$ ;  $^1\text{H}$  NMR (500 MHz,  $\text{CDCl}_3$ , 26 °C):  $\delta_{\text{H}}$  0.85–0.92 (12H, m), 1.24–1.35 (6H, m), 1.50–1.70 (6H, m), 3.75/3.77 (3H, s/s), 4.11–4.25 (5H, m), 4.61/4.69 (1H, m/m), 5.09 (2H, s), 5.13/5.16 (1H, m/m), 5.49/5.68 (1H, [d,  $J = 7.9$  Hz/ d,  $J = 7.9$  Hz]), 6.66/6.76 (1H, [d,  $J = 8.2$  Hz/ d,  $J = 7.6$  Hz]), 7.26–7.35 (5H, m), 7.34/7.56 (1H, [m/ d,  $J = 8.5$  Hz]);  $^{13}\text{C}$  NMR (125.7 MHz,  $\text{CDCl}_3$ , 26 °C):  $\delta_{\text{C}}$  16.2 (2  $\times$   $\text{CH}_3$ , d,  $J_{\text{C,P}} = 5.8$  Hz), 21.8 ( $\text{CH}_3$ ), 22.0/22.1 ( $\text{CH}_3$ ), 22.7/22.8 ( $\text{CH}_3$ ), 22.9 ( $\text{CH}_3$ ), 24.5 ( $\text{CH}$ ), 24.6 ( $\text{CH}$ ), 41.1 ( $\text{CH}_2$ ), 41.2 ( $\text{CH}_2$ ), 50.5/50.6 ( $\text{CH}$ , [d,  $J_{\text{C,P}} = 146$  Hz/ d,  $J_{\text{C,P}} = 147.2$  Hz), 51.4/51.5 ( $\text{CH}$ ), 53.0/53.1 ( $\text{CH}_3$ ), 53.4/53.5 ( $\text{CH}$ ), 63.6 ( $\text{CH}_2$ , d,  $J_{\text{C,P}} = 7.4$  Hz), 63.9 ( $\text{CH}_2$ , d,  $J_{\text{C,P}} = 6.4$  Hz), 67.0 ( $\text{CH}_2$ ), 128.0 (2  $\times$   $\text{CH}$ ), 128.1 ( $\text{CH}$ ), 128.4 (2  $\times$   $\text{CH}$ ), 136.2 (C), 156.3 (C), 166.8/166.9 (C), 171.8 (C), 172.3/172.5 (C); HRMS calcd for  $\text{C}_{27}\text{H}_{44}\text{N}_3\text{O}_9\text{P}$  [ $\text{M}^+$ ], 585.2815; found, 585.2804.

#### Preparation of Dehydroamino Acids.

**Scheme 9.** Preparation of the HWE product **8**

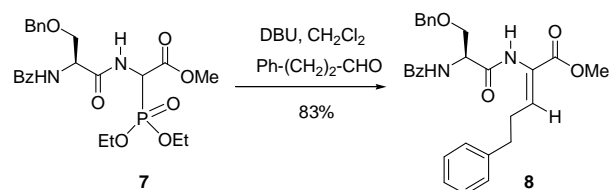

**General Procedures for the Horner-Wadsworth-Emmons Reaction. Method A.** To a solution of the  $\alpha$ -phosphonate (0.2 mmol) in dry  $\text{CH}_2\text{Cl}_2$  (2 mL) was added a solution of DBU (151  $\mu\text{L}$ , 76 mg, 0.5 mmol) in dry  $\text{CH}_2\text{Cl}_2$  (1 mL). The reaction mixture was stirred for 10 min, and then was added the aldehyde (0.4 mmol) in dry  $\text{CH}_2\text{Cl}_2$  (1 mL). After stirring for 16 h, the solution was poured into saturated aqueous  $\text{NaHCO}_3$  and extracted with  $\text{CH}_2\text{Cl}_2$ . The organic layer was dried over sodium sulfate, filtered and evaporated under vacuum. The residue was purified by chromatography on silica gel (hexanes/EtOAc) affording the dehydroamino acid derivatives.

**Method B.** To a solution of the amino phosphonate (0.2 mmol) in dry acetone (4 mL) was added DBU (302  $\mu\text{L}$ , 152 mg, 1.0 mmol). The reaction mixture was stirred for 24 h, followed by work-up and purification as described for Method A, giving the dehydroamino acid derivatives.

**(Z)-(N-Benzoyl-O-benzyl-L-seryl)- $\alpha,\beta$ -dehydro-5-(phenyl)norvaline Methyl Ester (8).** Obtained from the amino phosphonate **7** (101 mg, 0.2 mmol) and hydrocinnamaldehyde (53  $\mu\text{L}$ , 54 mg, 0.4 mmol), according to the General HWE Procedure, Method A. After purification by column chromatography (hexanes/EtOAc 65:35), compound **8** (81 mg, 83%) was isolated as a syrup;  $[\alpha]_{\text{D}} = +12$  (*c* 0.52,  $\text{CHCl}_3$ ); IR ( $\text{CHCl}_3$ )  $\nu_{\text{max}}$  3409, 1722, 1695, 1659, 1506  $\text{cm}^{-1}$ ;  $^1\text{H}$  NMR (500 MHz,  $\text{CDCl}_3$ , 26  $^\circ\text{C}$ ):  $\delta_{\text{H}}$  2.39 (2H, ddd, *J* = 6.6, 7.6, 7.6 Hz), 2.69 (2H, dd, *J* = 7.6, 7.6 Hz), 3.63 (1H, dd, *J* = 7.6, 9.1 Hz), 3.66 (3H, s), 4.00 (1H, dd, *J* = 4.1, 9.2 Hz), 4.54 (1H, d, *J* = 11.7 Hz), 4.58 (1H, d, *J* = 11.8 Hz), 4.83 (1H, m), 6.67 (1H, dd, *J* = 7.3, 7.6 Hz), 7.09 (1H, br b), 7.10 (2H, dd, *J* = 7.8, 7.9 Hz), 7.11 (1H, dd, *J* = 7.4, 7.8 Hz), 7.19 (2H, dd, *J* = 7.6, 7.8 Hz), 7.24 (1H, m), 7.25–7.28 (4H, m), 7.37 (2H, dd, *J* = 7.8, 7.9 Hz), 7.46 (1H, dd, *J* = 7.6, 7.8 Hz), 7.74 (2H, d, *J* = 7.5 Hz), 7.88 (1H, br b);  $^{13}\text{C}$  NMR (125.7 MHz,  $\text{CDCl}_3$ , 26  $^\circ\text{C}$ ):  $\delta_{\text{C}}$  30.3 ( $\text{CH}_2$ ), 34.1 ( $\text{CH}_2$ ), 52.3 ( $\text{CH}_3$ ), 52.9 (CH), 69.3 ( $\text{CH}_2$ ), 73.6 ( $\text{CH}_2$ ), 125.2 (C), 126.1 (CH), 127.1 (2  $\times$  CH), 127.9 (2  $\times$  CH), 128.0 (CH), 128.3 (2  $\times$  CH), 128.4 (2  $\times$  CH), 128.5 (2  $\times$  CH), 128.6 (2  $\times$  CH), 131.9 (CH), 133.5 (C), 137.2 (C), 137.8 (CH), 140.8 (C), 164.5 (C), 167.3 (C), 168.7 (C); HRMS calcd for  $\text{C}_{29}\text{H}_{30}\text{N}_2\text{O}_5$  [ $\text{M}^+$ ], 486.2155; found, 486.2147.

**Scheme 10.** Preparation of the HWE product **9**

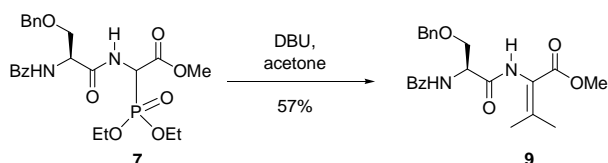

**(Z)-(N-Benzoyl-O-benzyl-L-seryl)- $\alpha,\beta$ -dehydrovaline Methyl Ester (9).** Obtained from the amino phosphonate **7** (101 mg, 0.2 mmol), according to the General HWE Procedure, Method B. After purification by column chromatography (hexanes/EtOAc 60:40), compound **9** (47 mg, 57%) was isolated as a syrup;  $[\alpha]_{\text{D}} = +16$  (*c* 0.56,  $\text{CHCl}_3$ ); IR ( $\text{CHCl}_3$ )  $\nu_{\text{max}}$  3414, 1723, 1687, 1658, 1507  $\text{cm}^{-1}$ ;  $^1\text{H}$  NMR (500 MHz,  $\text{CDCl}_3$ , 26  $^\circ\text{C}$ ):  $\delta_{\text{H}}$  1.78 (3H, s), 2.15 (3H, s), 3.68 (1H, m), 3.69 (3H, s), 4.08 (1H, dd, *J* = 4.4, 9.5 Hz), 4.61 (1H, d, *J* = 11.7 Hz), 4.68 (1H, d, *J* = 11.8 Hz), 4.87 (1H, m), 7.19 (1H, d, *J* = 6.0 Hz), 7.32 (1H, m), 7.33–7.36 (4H, m), 7.44 (2H, dd, *J* = 7.6, 7.8 Hz), 7.52 (1H, dd, *J* = 7.0, 7.8 Hz), 7.81 (2H, d, *J* = 7.9 Hz), 7.86 (1H, brb);  $^{13}\text{C}$  NMR (125.7 MHz,  $\text{CDCl}_3$ , 26  $^\circ\text{C}$ ):  $\delta_{\text{C}}$  21.2 ( $\text{CH}_3$ ), 22.3 ( $\text{CH}_3$ ), 51.7 ( $\text{CH}_3$ ), 52.6 (CH), 69.3 ( $\text{CH}_2$ ), 73.7 ( $\text{CH}_2$ ), 120.7 (C), 127.1 (2  $\times$  CH), 127.9 (2  $\times$  CH), 128.1 (CH), 128.5 (2  $\times$  CH), 128.6 (2  $\times$  CH), 131.9 (CH), 133.6 (C), 137.2 (C), 145.9 (C), 164.9 (C), 167.3 (C), 168.9 (C); HRMS calcd for  $\text{C}_{23}\text{H}_{26}\text{N}_2\text{O}_5$  [ $\text{M}^+$ ] 410.1842, found 410.1829.

**Scheme 11.** Preparation of the HWE product **13**

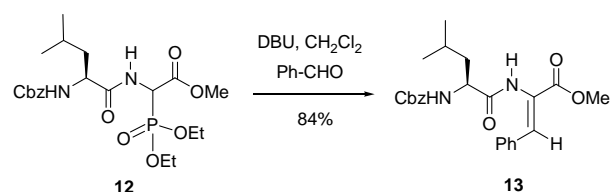

**(Z)-(N-Benzyloxycarbonyl-L-leucyl)- $\alpha,\beta$ -dehydrophenylalanine Methyl Ester (13).**<sup>1</sup> Obtained from the amino phosphonate **12** (94 mg, 0.2 mmol) and benzaldehyde (41  $\mu\text{L}$ , 42 mg, 0.4 mmol) according to the General HWE Procedure, Method A. After purification by rotatory chromatography (hexanes/EtOAc 80:20), compound **13** (71 mg, 84%) was isolated as a syrup;  $[\alpha]_{\text{D}} = -11$  (*c* 0.30,  $\text{CHCl}_3$ ); IR ( $\text{CHCl}_3$ )  $\nu_{\text{max}}$  3430, 1716, 1705, 1504  $\text{cm}^{-1}$ ;  $^1\text{H}$  NMR (500 MHz,  $\text{CDCl}_3$ , 26  $^\circ\text{C}$ ):  $\delta_{\text{H}}$  0.94 (3H, d, *J* = 7.3 Hz), 0.95 (3H, d, *J* = 6.3 Hz), 1.54 (1H, m), 1.70–1.78 (2H, m), 3.80 (3H, s), 4.35 (1H, m), 5.09 (1H, d, *J* = 12.6 Hz), 5.13 (1H, d, *J* = 12.0 Hz), 5.26 (1H, d, *J* = 8.2 Hz), 7.29–7.34 (8H, m), 7.41 (1H, s), 7.45 (2H, m), 7.74 (1H, br b);  $^{13}\text{C}$  NMR (125.7 MHz,  $\text{CDCl}_3$ , 26  $^\circ\text{C}$ ):  $\delta_{\text{C}}$  22.0 ( $\text{CH}_3$ ), 22.8 ( $\text{CH}_3$ ), 24.6 (CH), 40.6 ( $\text{CH}_2$ ), 52.6 ( $\text{CH}_3$ ), 53.7 (CH), 67.2 ( $\text{CH}_2$ ), 123.8 (C), 128.0 (2  $\times$  CH), 128.2 (2  $\times$  CH), 128.5 (4  $\times$  CH), 129.5 (CH), 129.7 (CH), 132.9 (CH), 133.5 (C), 136.0 (C), 156.4 (C), 165.4 (C), 170.8 (C); HRMS calcd for  $\text{C}_{24}\text{H}_{28}\text{N}_2\text{O}_5$  [ $\text{M}^+$ ], 424.1998; found, 424.1982.

<sup>1</sup> Buck, R. T.; Clarke, P. A.; Coe, D. M.; Drysdale, M. J.; Ferris, L.; Haigh, D.; Moody, C. J.; Pearson, N. D.; Swann, E. *Chem. Eur. J.* **2000**, *6*, 2160–2167.



**Scheme 12.** Preparation of the HWE product **14**

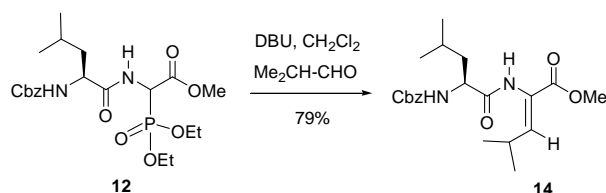

**(Z)-(N-Benzyloxycarbonyl-L-leucyl)- $\alpha,\beta$ -dehydro leucine Methyl Ester (**14**).** Obtained from the amino phosphonate **12** (94 mg, 0.2 mmol) and isobutyraldehyde (37  $\mu$ L, 29 mg, 0.4 mmol), according to the General HWE Procedure, Method A. After purification by column chromatography (hexanes/EtOAc 85:15), compound **15** (62 mg, 79%) was isolated as a syrup;  $[\alpha]_D = -25$  (*c* 0.19, CHCl<sub>3</sub>); IR (CHCl<sub>3</sub>)  $\nu_{\max}$  3430, 1717, 1701, 1508 cm<sup>-1</sup>; <sup>1</sup>H NMR (500 MHz, CDCl<sub>3</sub>, 26 °C):  $\delta_H$  0.95 (6H, d, *J* = 6.3 Hz), 1.00 (3H, d, *J* = 6.6 Hz), 1.02 (3H, d, *J* = 6.3 Hz), 1.56 (1H, m), 1.69–1.78 (2H, m), 2.54 (1H, m), 3.72 (3H, s), 4.34 (1H, m), 5.11 (2H, s), 5.38 (1H, d, *J* = 7.3 Hz), 6.51 (1H, d, *J* = 10.4 Hz), 7.28–7.37 (5H, m), 7.51 (1H, br b). <sup>13</sup>C NMR (100.6 MHz, CDCl<sub>3</sub>, 26 °C):  $\delta_C$  21.5 (CH<sub>3</sub>), 21.6 (CH<sub>3</sub>), 21.9 (CH<sub>3</sub>), 22.9 (CH<sub>3</sub>), 24.7 (CH), 27.9 (CH), 41.1 (CH<sub>2</sub>), 52.2 (CH<sub>3</sub>), 53.6 (CH), 67.1 (CH<sub>2</sub>), 122.9 (C), 127.9 (2  $\times$  CH), 128.1 (CH), 128.5 (2  $\times$  CH), 136.1 (C), 146.0 (CH), 156.3 (C), 165.0 (C), 171.2 (C); HRMS calcd for C<sub>21</sub>H<sub>30</sub>N<sub>2</sub>O<sub>5</sub> [*M*<sup>+</sup>], 390.2155; found, 390.2163.

**Scheme 13.** Preparation of the HWE product **15**

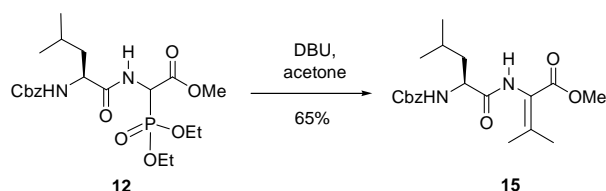

**(Z)-(N-Benzyloxycarbonyl-L-leucyl)- $\alpha,\beta$ -dehydrovaline Methyl Ester (**15**).** Obtained from the amino phosphonate **12** (94 mg, 0.2 mmol), according to the General HWE Procedure, Method B. After purification by column chromatography (hexanes/EtOAc 75:25), compound **15** (49 mg, 65%) was isolated as a syrup;  $[\alpha]_D = -39$  (*c* 0.13, CHCl<sub>3</sub>); IR (CHCl<sub>3</sub>)  $\nu_{\max}$  3428, 1718, 1507 cm<sup>-1</sup>; <sup>1</sup>H NMR (500 MHz, CDCl<sub>3</sub>, 26 °C):  $\delta_H$  0.93 (3H, d, *J* = 6.0 Hz), 0.94 (3H, d, *J* = 6.3 Hz), 1.54 (1H, m), 1.67–1.73 (2H, m), 1.76 (3H, s), 2.12 (3H, s), 3.67 (3H, s), 4.30 (1H, m), 5.09 (2H, brs), 5.39 (1H, brb), 7.26–7.38 (5H, m), 7.50 (1H, brb); <sup>13</sup>C NMR (125.7 MHz, CDCl<sub>3</sub>, 26 °C):  $\delta_C$  21.2 (CH<sub>3</sub>), 22.1 (CH<sub>3</sub>), 22.4 (CH<sub>3</sub>), 22.8 (CH<sub>3</sub>), 24.7 (CH), 40.9 (CH<sub>2</sub>), 51.6 (CH<sub>3</sub>), 53.5 (CH), 67.1 (CH<sub>2</sub>), 120.7 (C), 128.0 (2  $\times$  CH), 128.2

(CH), 128.5 (2  $\times$  CH), 136.1 (C), 146.3 (C), 156.3 (C), 164.9 (C), 170.9 (C); HRMS calcd for C<sub>20</sub>H<sub>28</sub>N<sub>2</sub>O<sub>5</sub> [*M*<sup>+</sup>], 376.1998; found, 376.2004.

**Scheme 14.** Preparation of the HWE product **16**

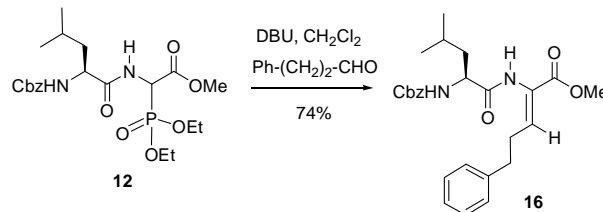

**(Z)-(N-Benzyloxycarbonyl-L-leucyl)- $\alpha,\beta$ -dehydro-5-(phenyl)norvaline Methyl Ester (**16**).** Obtained from the amino phosphonate **12** (94 mg, 0.2 mmol) and hydrocinnamaldehyde (53  $\mu$ L, 54 mg, 0.4 mmol), according to the General HWE Procedure, Method A. After purification by column chromatography (hexanes/EtOAc 75:25), compound **16** (67 mg, 74%) was isolated as a syrup;  $[\alpha]_D = -27$  (*c* 0.24, CHCl<sub>3</sub>); IR (CHCl<sub>3</sub>)  $\nu_{\max}$  3420, 1716, 1703, 1504 cm<sup>-1</sup>; <sup>1</sup>H NMR (500 MHz, CDCl<sub>3</sub>, 26 °C):  $\delta_H$  0.95 (6H, d, *J* = 6.6 Hz), 1.53 (1H, m), 1.65–1.75 (2H, m), 2.45 (2H, m), 2.77 (2H, dd, *J* = 7.2, 7.6 Hz), 3.73 (3H, s), 4.25 (1H, m), 5.08 (1H, d, *J* = 12.6 Hz), 5.12 (1H, d, *J* = 12.0 Hz), 5.17 (1H, br b), 6.72 (1H, dd, *J* = 7.6, 7.6 Hz), 7.17–7.21 (4H, m), 7.28 (2H, dd, *J* = 7.3, 7.3 Hz), 7.33–7.40 (5H, m); <sup>13</sup>C NMR (100.6 MHz, CDCl<sub>3</sub>, 26 °C):  $\delta_C$  21.9 (CH<sub>3</sub>), 22.9 (CH<sub>3</sub>), 24.7 (CH), 30.3 (CH<sub>2</sub>), 34.1 (CH<sub>2</sub>), 41.2 (CH<sub>2</sub>), 52.3 (CH<sub>3</sub>), 53.7 (CH), 67.1 (CH<sub>2</sub>), 125.2 (C), 126.1 (CH), 128.0 (2  $\times$  CH), 128.2 (CH), 128.4 (2  $\times$  CH), 128.44 (2  $\times$  CH), 128.49 (2  $\times$  CH), 136.1 (C), 137.8 (CH), 140.9 (C), 156.2 (C), 164.6 (C), 170.8 (C); HRMS calcd for C<sub>26</sub>H<sub>32</sub>N<sub>2</sub>O<sub>5</sub> [*M*<sup>+</sup>], 452.2311; found, 452.2297.

**Scheme 15.** Preparation of the HWE product **19**

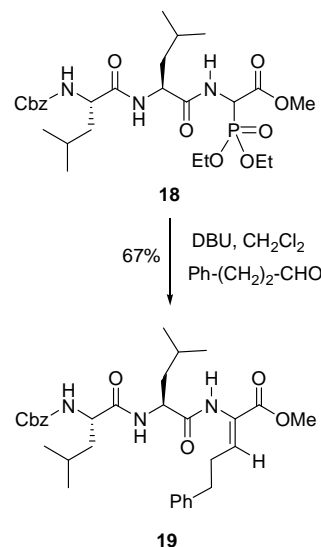

**(Z)-(N-Benzylloxycarbonyl-L-leucyl-L-leucyl)- $\alpha,\beta$ -dehydro-5-(phenyl)norvaline Methyl Ester (19).** Obtained from the amino phosphonate **18** (117 mg, 0.2 mmol) and hydrocinnamaldehyde (53  $\mu$ L, 54 mg, 0.4 mmol), according to the General HWE Procedure, Method A. After purification by column chromatography (hexanes/EtOAc 40:60), compound **19** (76 mg, 67%) was isolated as a syrup;  $[\alpha]_D = -50$  ( $c$  0.26,  $\text{CHCl}_3$ ); IR ( $\text{CHCl}_3$ )  $\nu_{\text{max}}$  3422, 1716, 1504  $\text{cm}^{-1}$ ;  $^1\text{H}$  NMR (500 MHz,  $\text{CDCl}_3$ , 26  $^\circ\text{C}$ ):  $\delta_{\text{H}}$  0.81–0.87 (12H, m), 1.38–1.71 (6H, m), 2.35–2.40 (2H, m), 2.65–2.72 (2H, m), 3.64 (3H, s), 4.13 (1H, m), 4.45 (1H, ddd,  $J = 6.0, 8.2, 8.2$

Hz), 4.98 (1H, d,  $J = 11$  Hz), 5.03 (1H, d,  $J = 12.0$  Hz), 5.24 (1H, br d,  $J = 7.6$  Hz), 6.58 (1H, br d,  $J = 8.2$  Hz), 6.62 (1H, dd,  $J = 7.3, 7.3$  Hz), 7.10–7.14 (3H, m), 7.19–7.30 (7H, m), 7.50 (1H, br b);  $^{13}\text{C}$  NMR (125.7 MHz,  $\text{CDCl}_3$ , 26  $^\circ\text{C}$ ):  $\delta_{\text{C}}$  21.8 ( $\text{CH}_3$ ), 22.0 ( $\text{CH}_3$ ), 22.8 ( $\text{CH}_3$ ), 22.9 ( $\text{CH}_3$ ), 24.7 ( $2 \times \text{CH}$ ), 30.2 ( $\text{CH}_2$ ), 34.1 ( $\text{CH}_2$ ), 40.6 ( $\text{CH}_2$ ), 41.1 ( $\text{CH}_2$ ), 51.8 ( $\text{CH}$ ), 52.3 ( $\text{CH}_3$ ), 53.6 ( $\text{CH}$ ), 67.2 ( $\text{CH}_2$ ), 125.3 (C), 126.1 ( $\text{CH}$ ), 128.1 ( $2 \times \text{CH}$ ), 128.2 ( $\text{CH}$ ), 128.4 ( $2 \times \text{CH}$ ), 128.5 ( $4 \times \text{CH}$ ), 136.0 (C), 137.8 ( $\text{CH}$ ), 140.9 (C), 156.4 (C), 164.6 (C), 170.4 (C), 172.5 (C); HRMS calcd for  $\text{C}_{32}\text{H}_{43}\text{N}_3\text{O}_6$   $[\text{M}^+]$ , 565.3152; found, 565.3165.

**<sup>1</sup>H and <sup>13</sup>C NMR spectra for compounds 4–9 and 11–19; NOE experiments for products 8, 13, 14, 16 and 19**

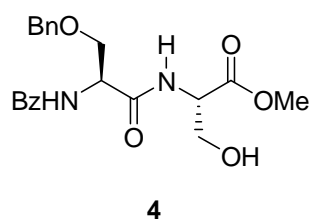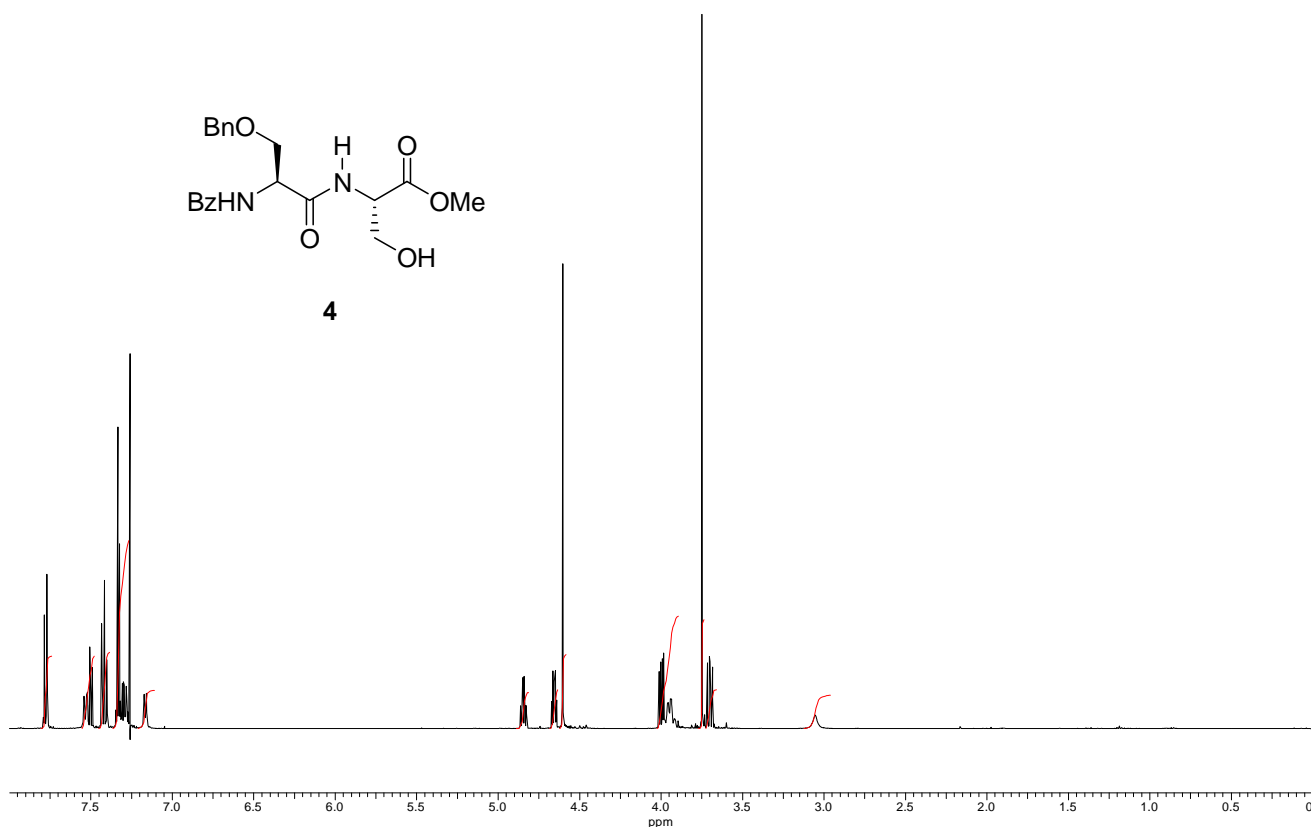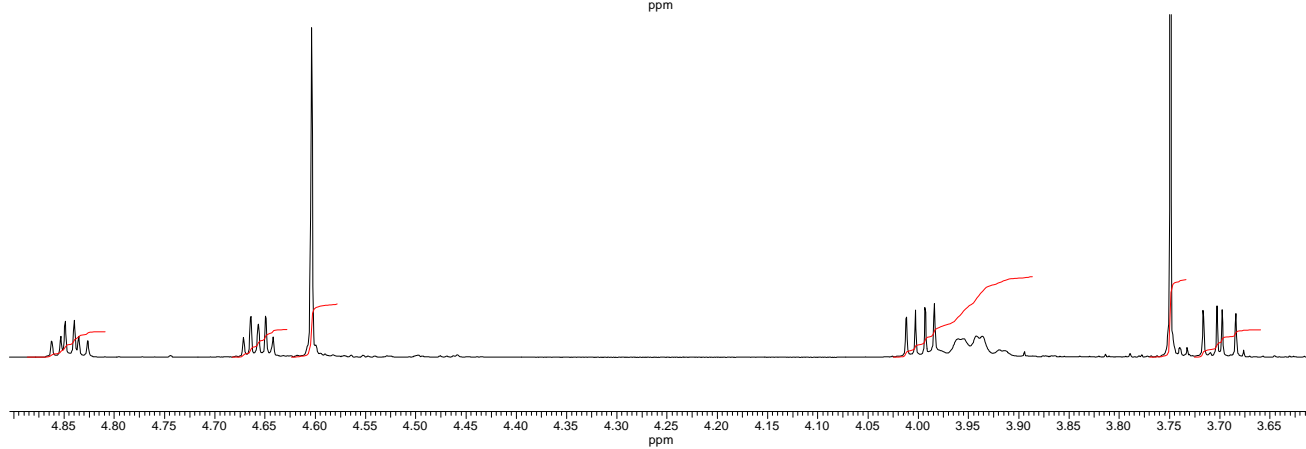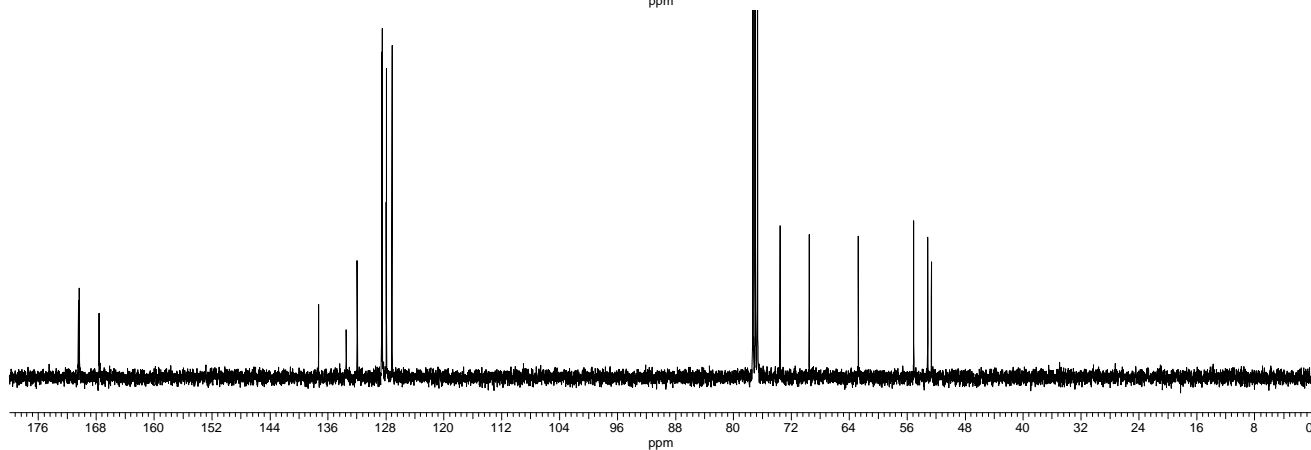



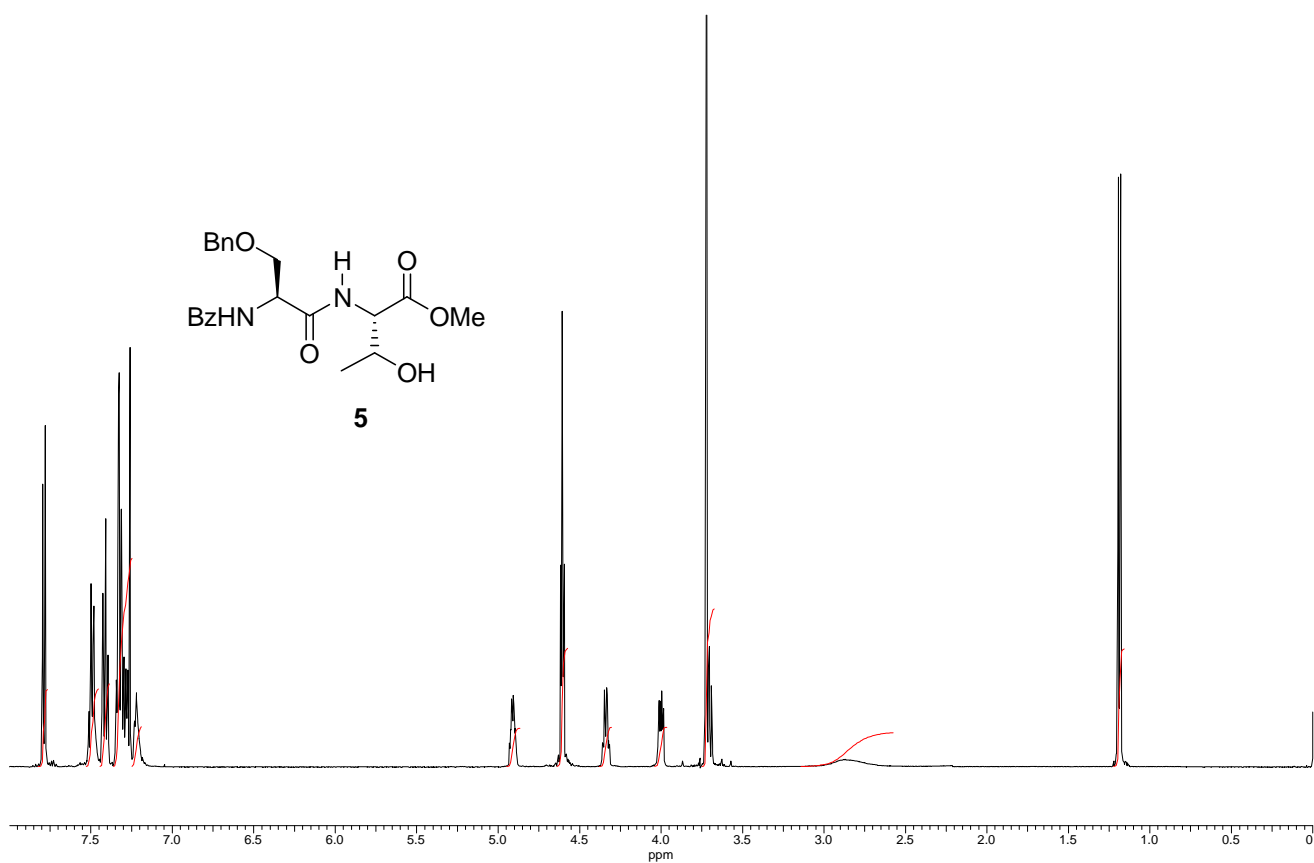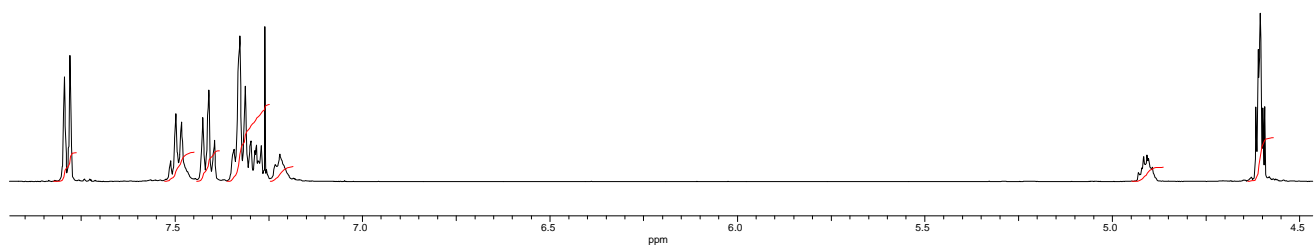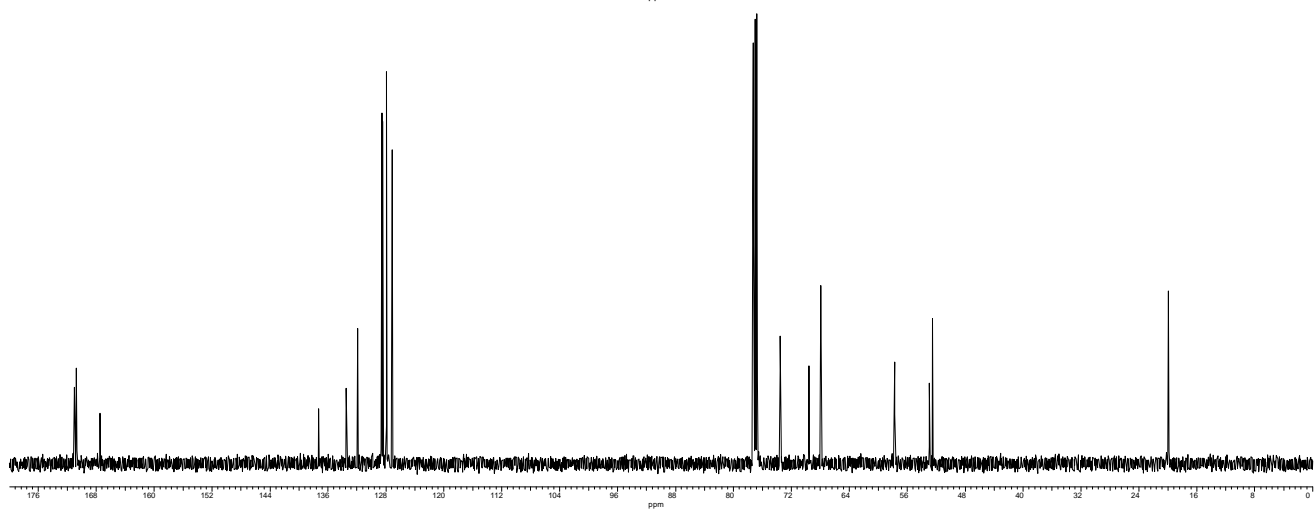

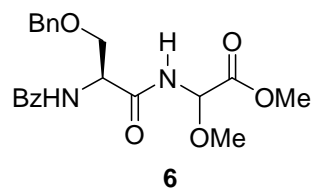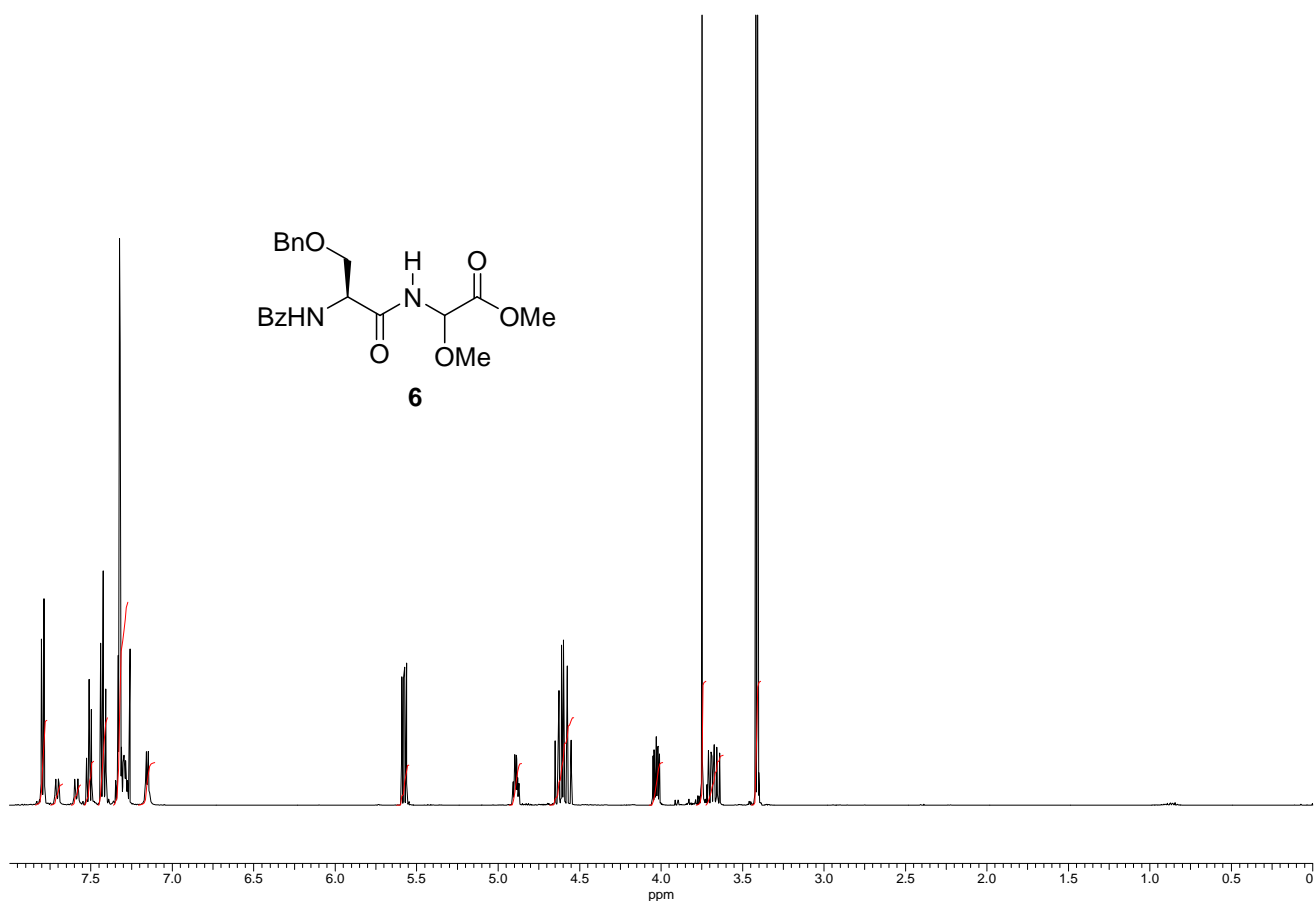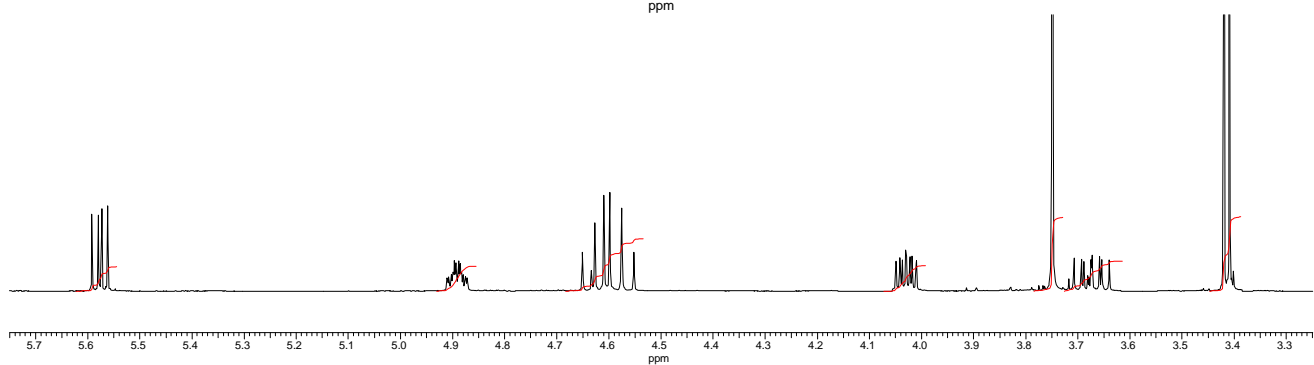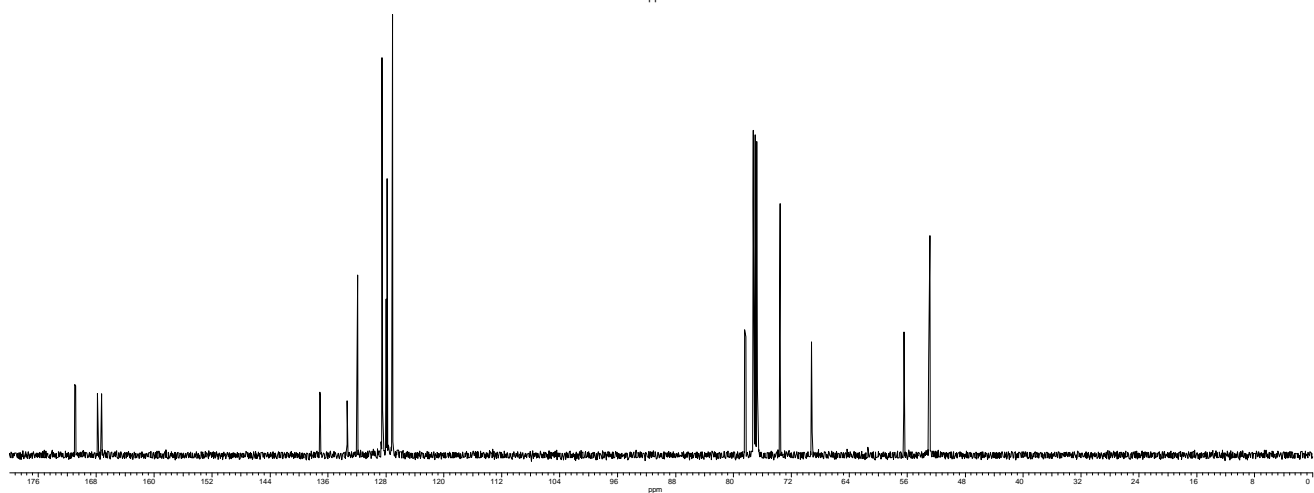

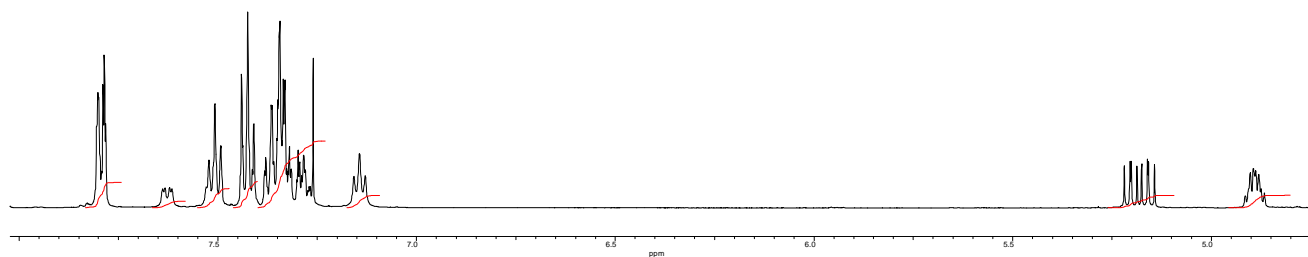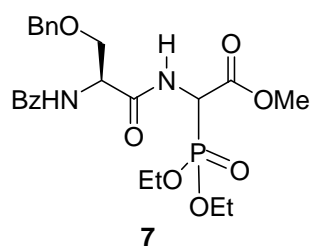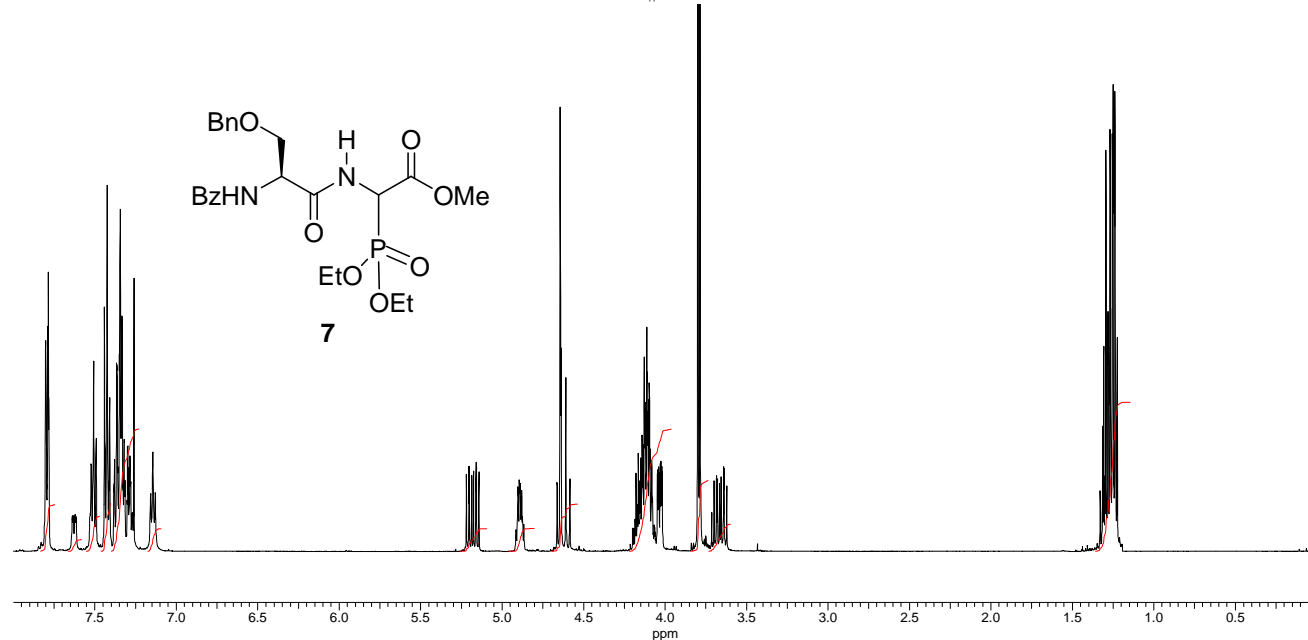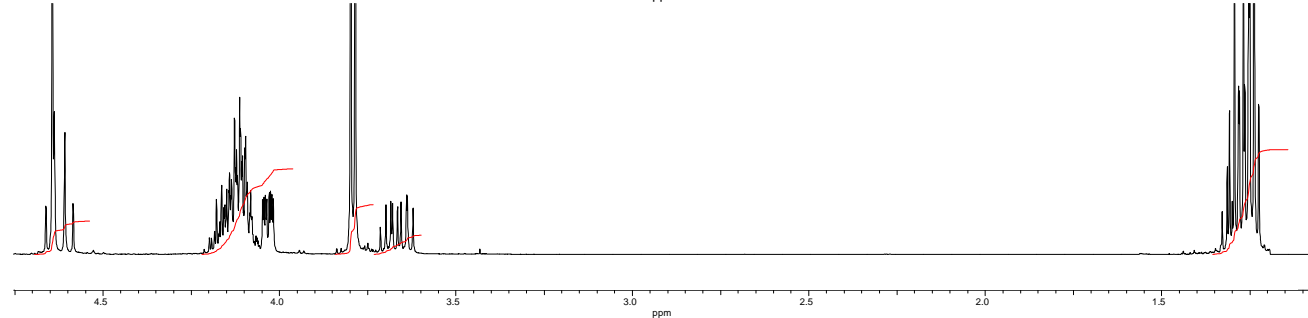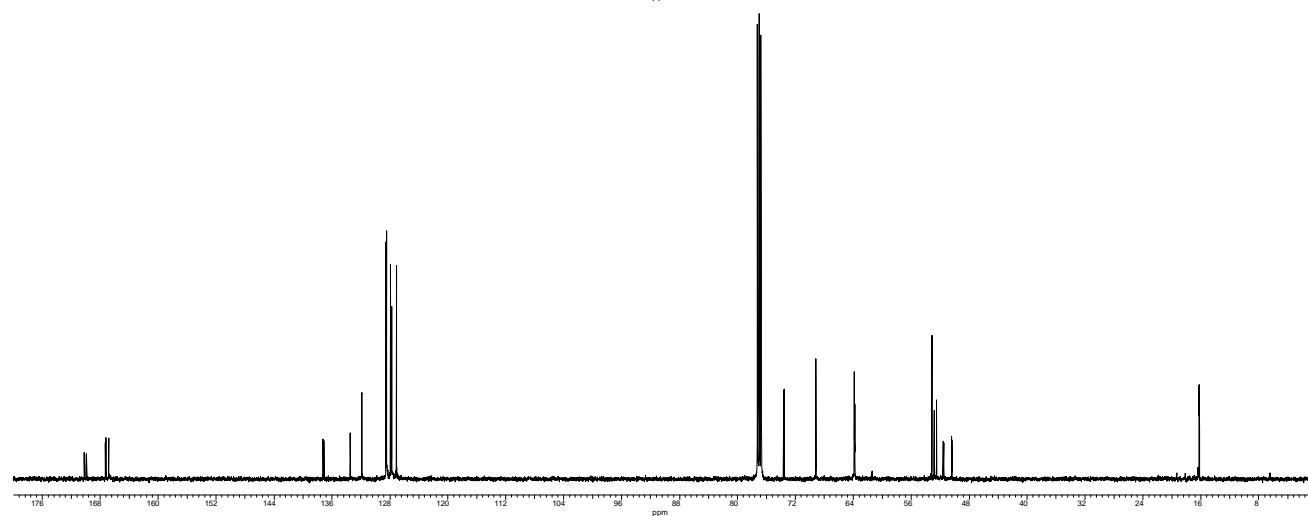

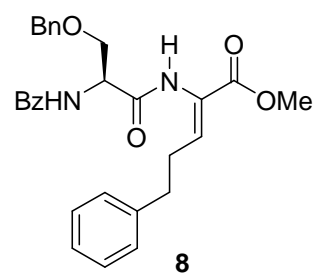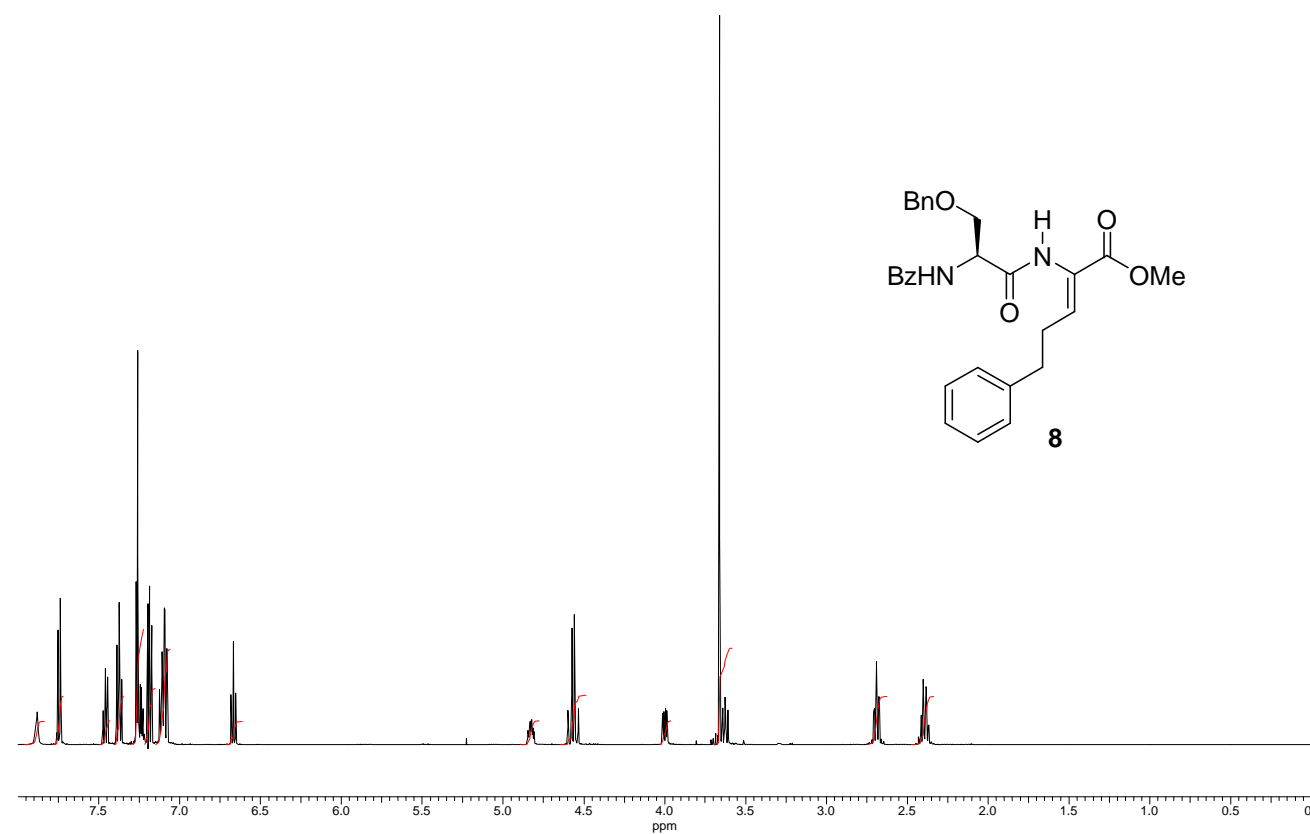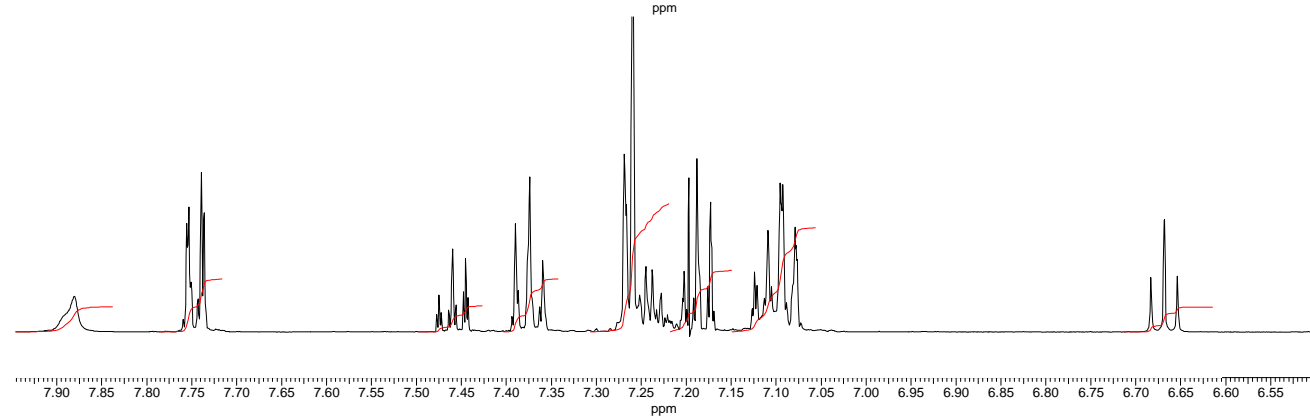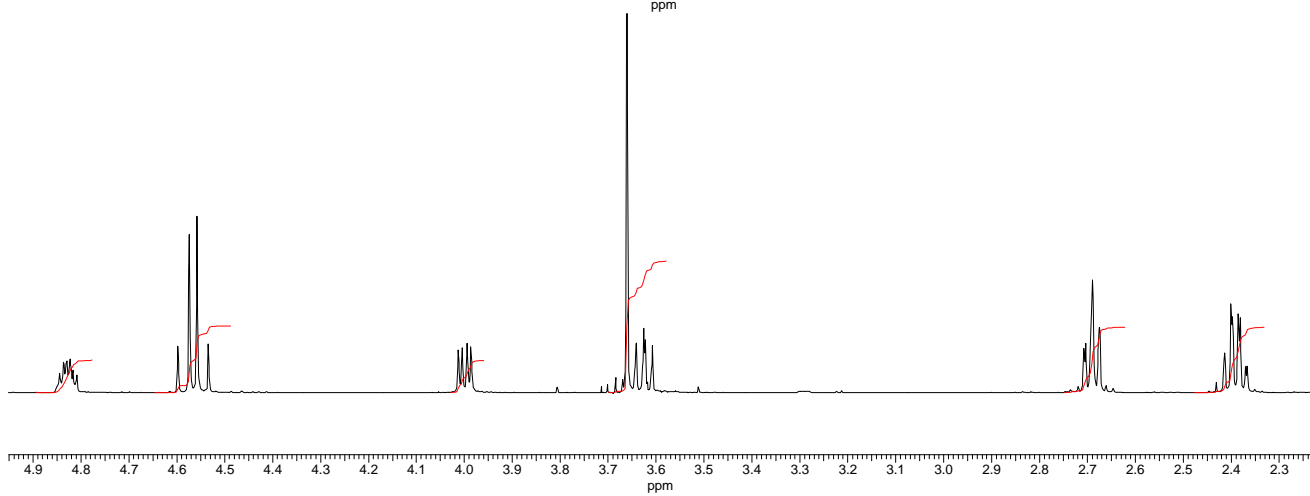

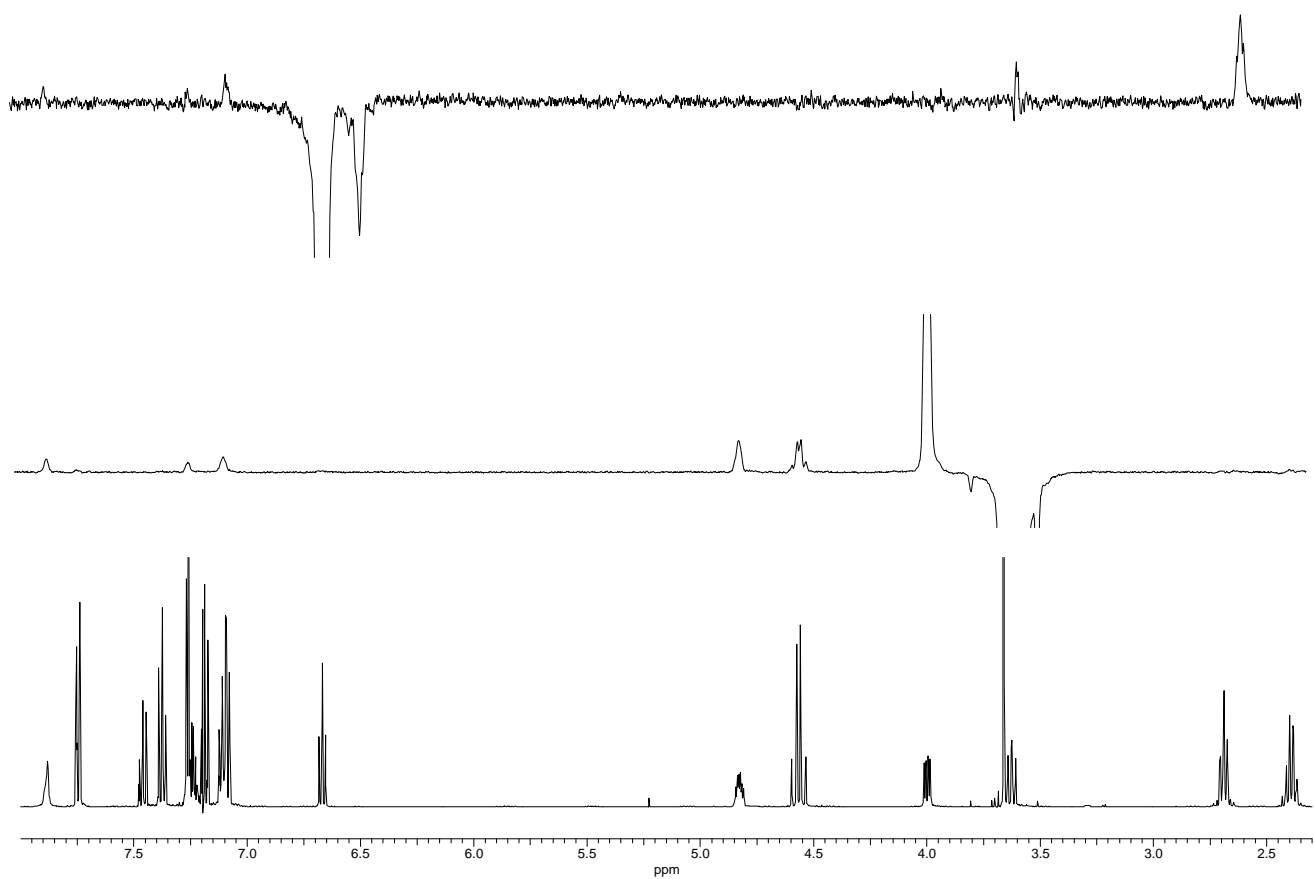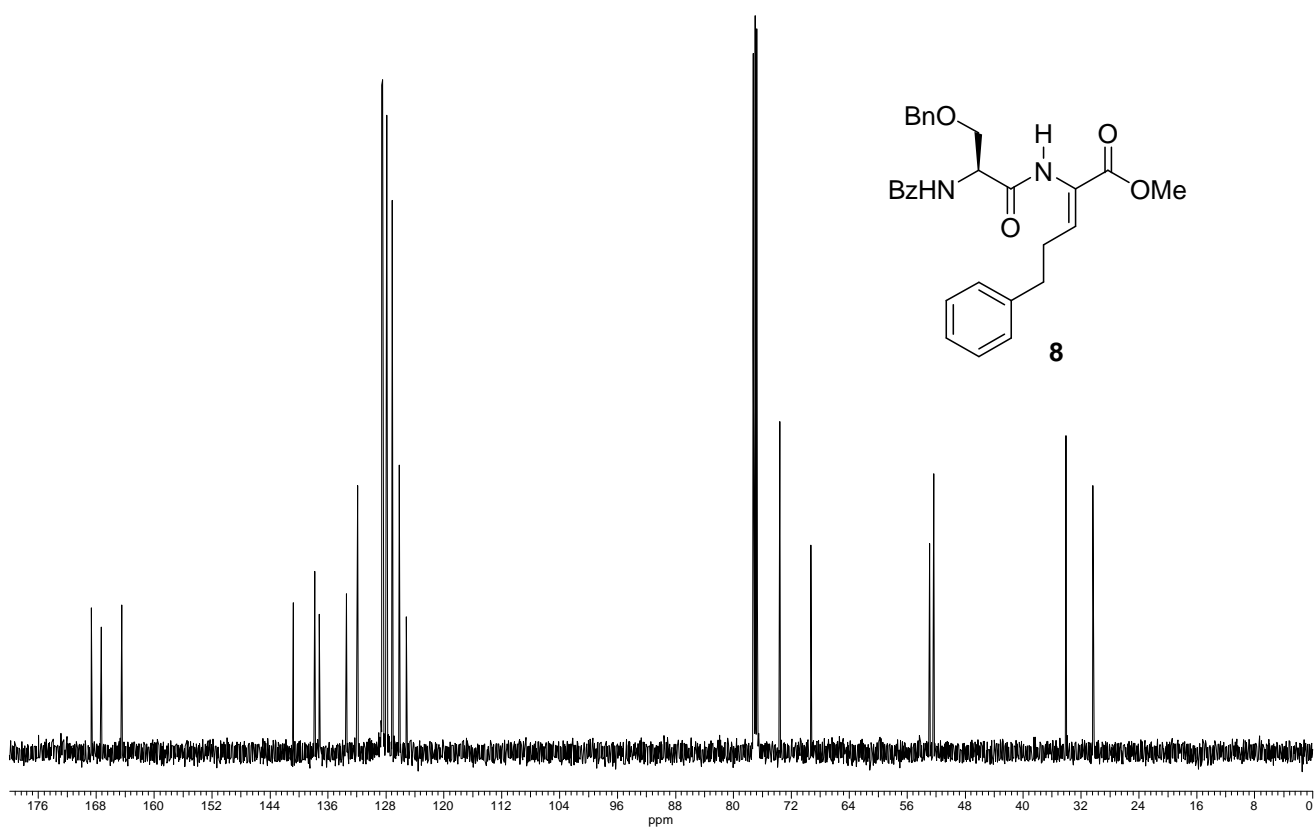

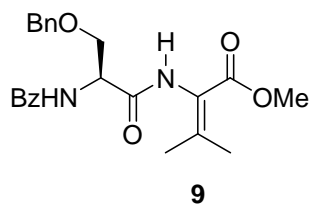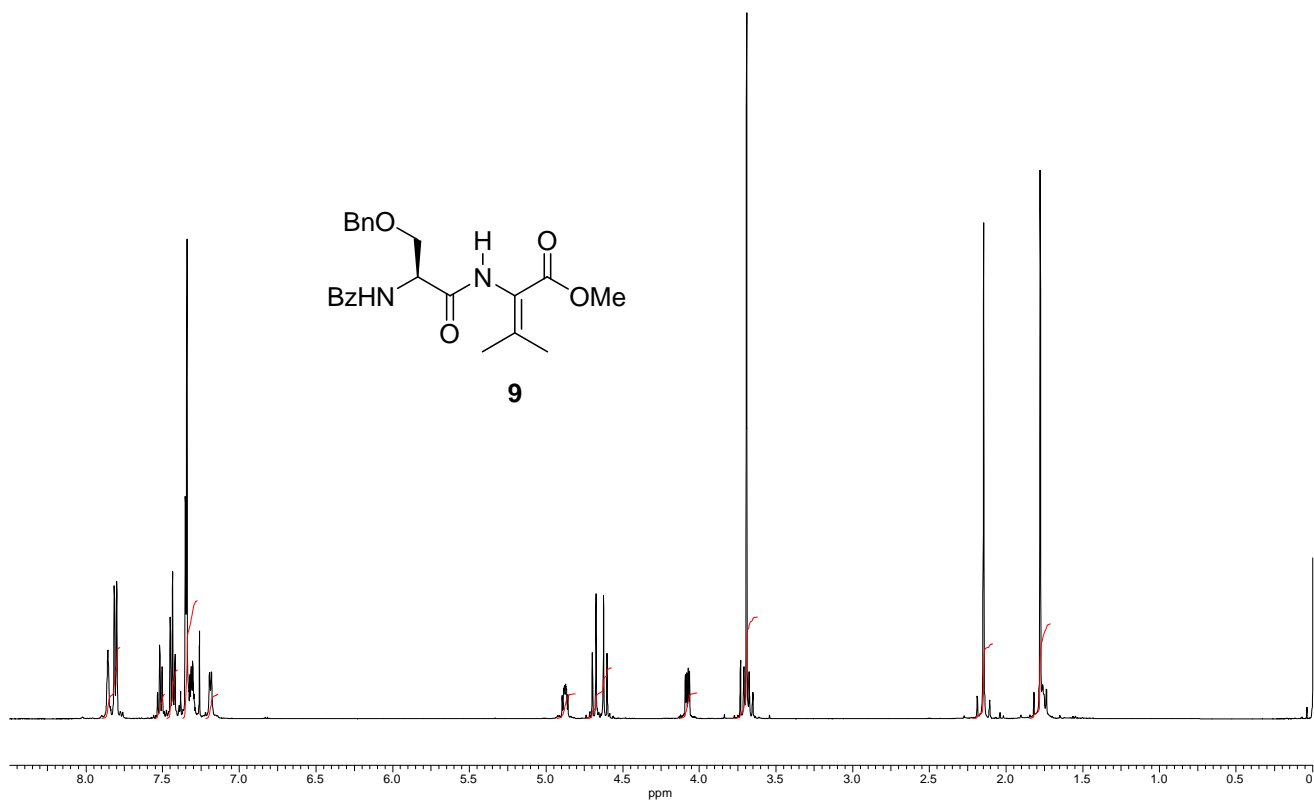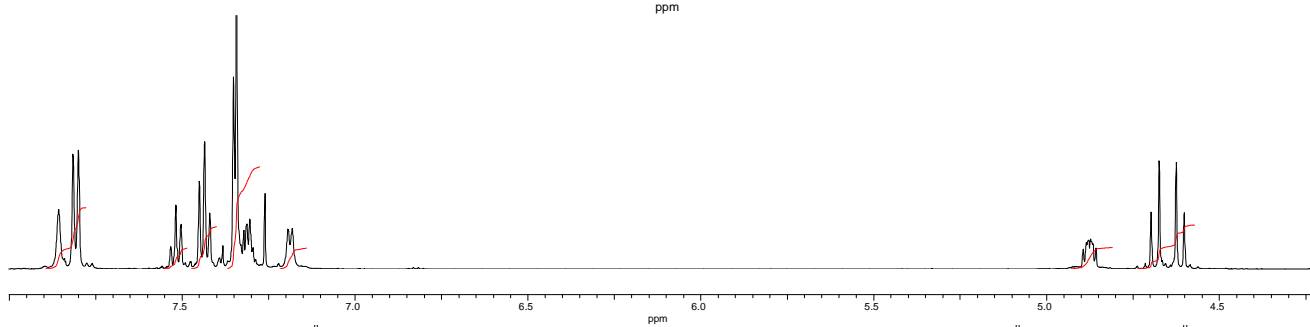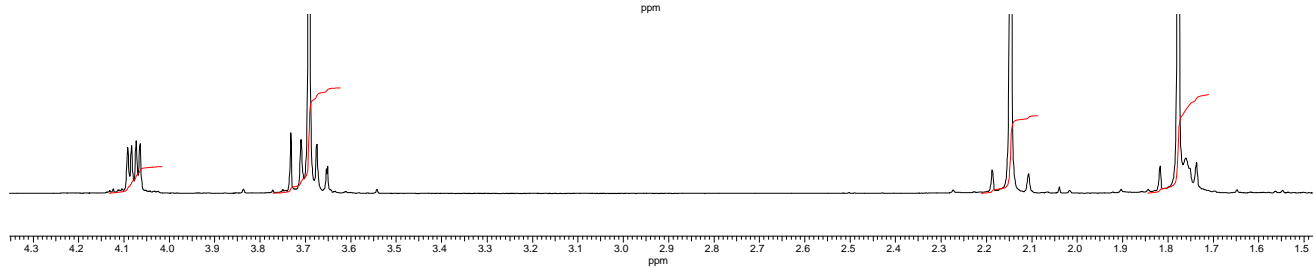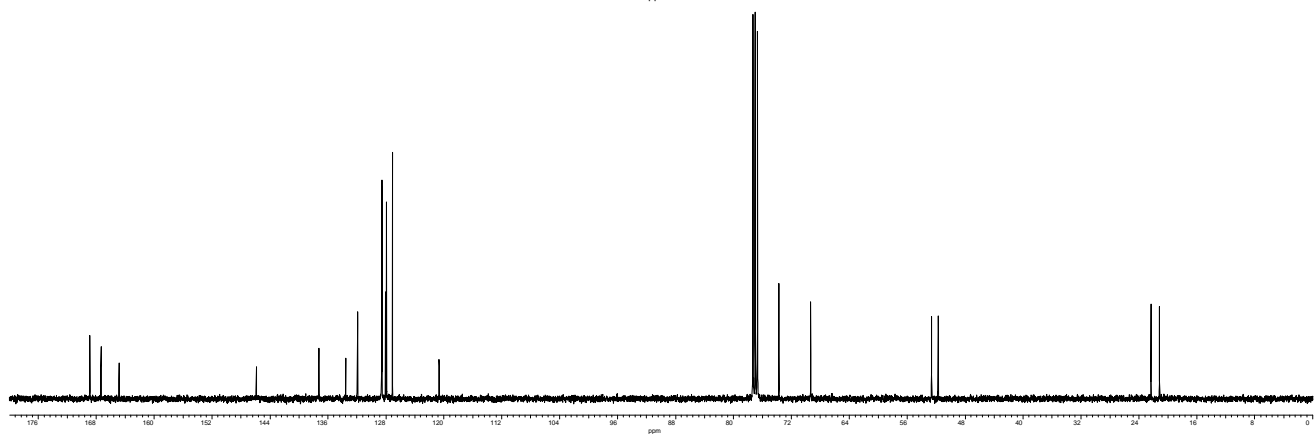



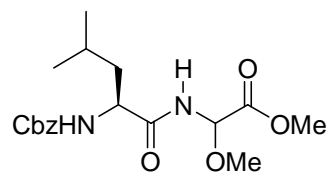

**10**

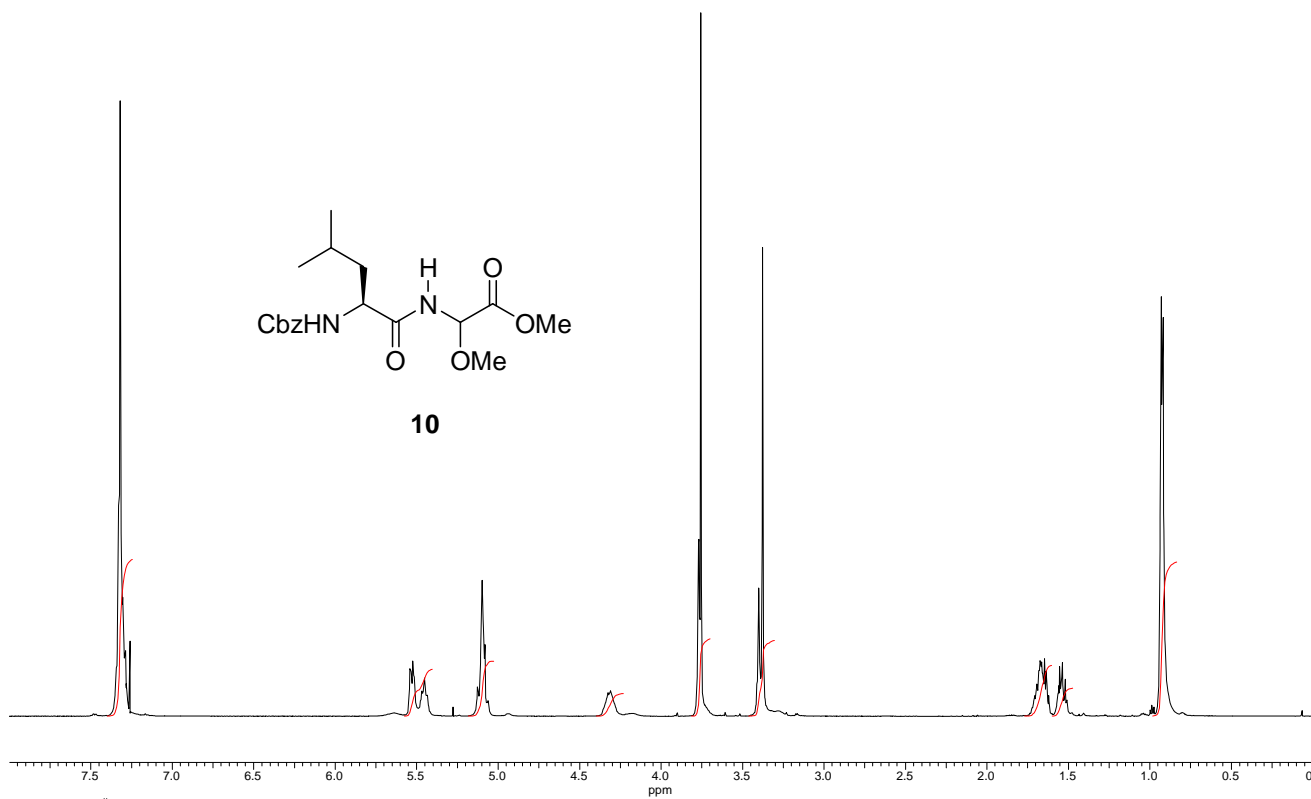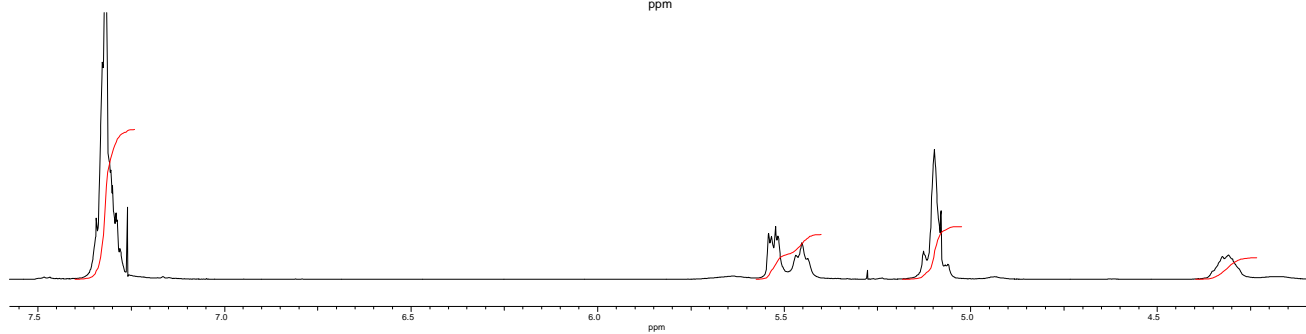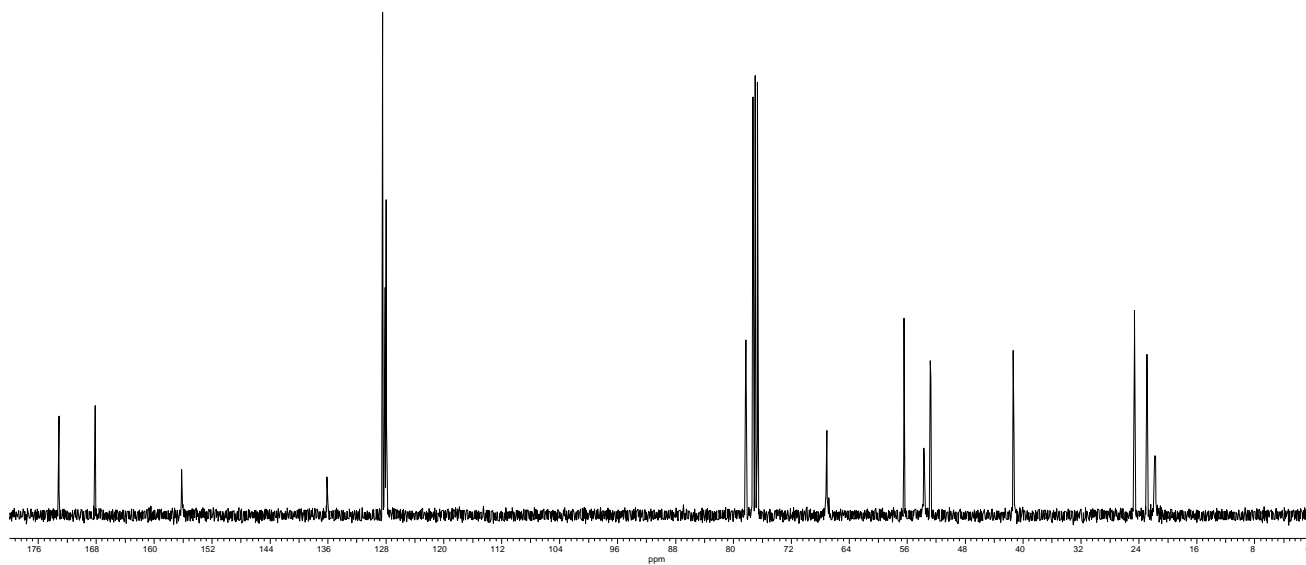

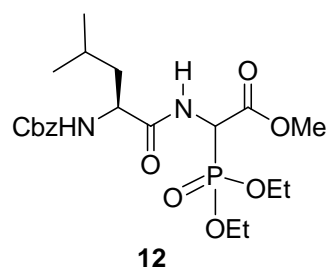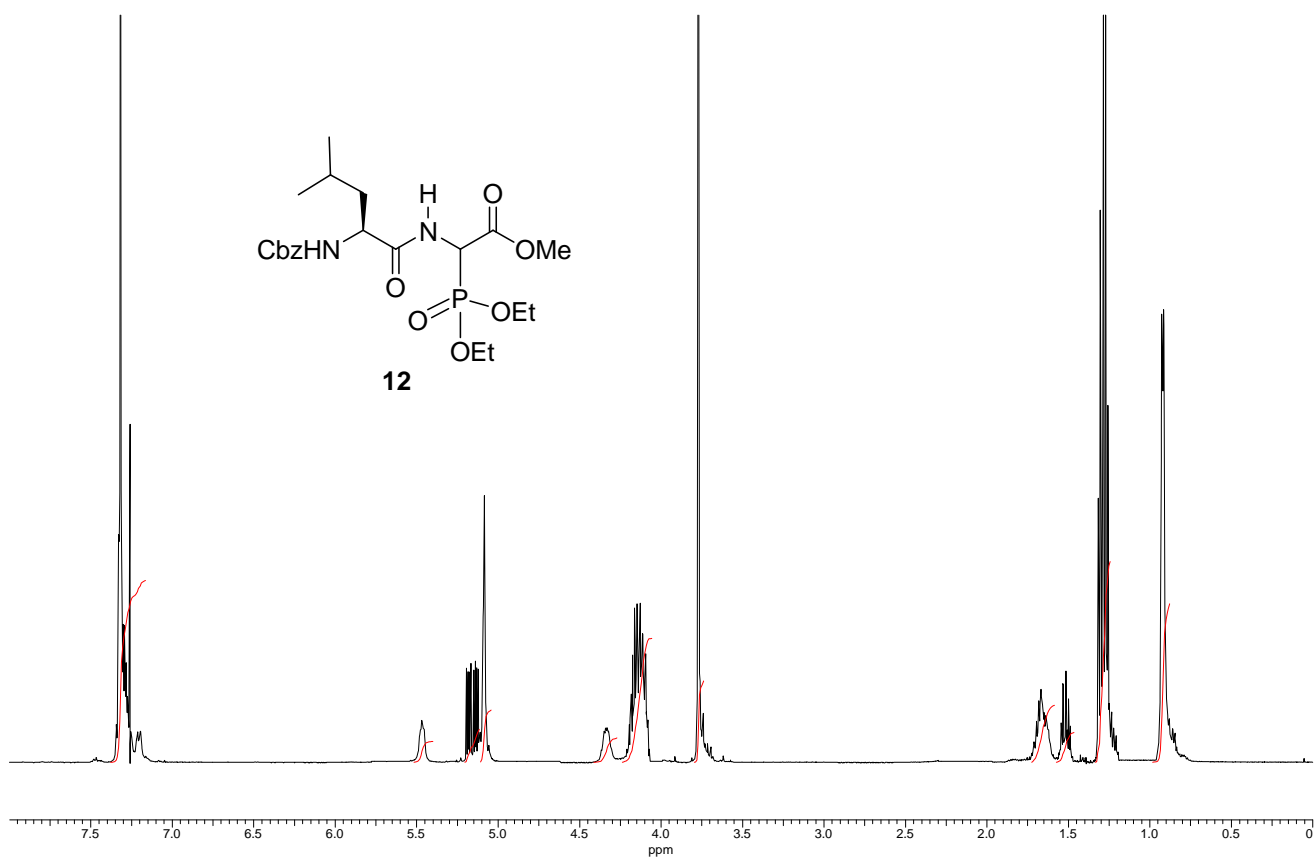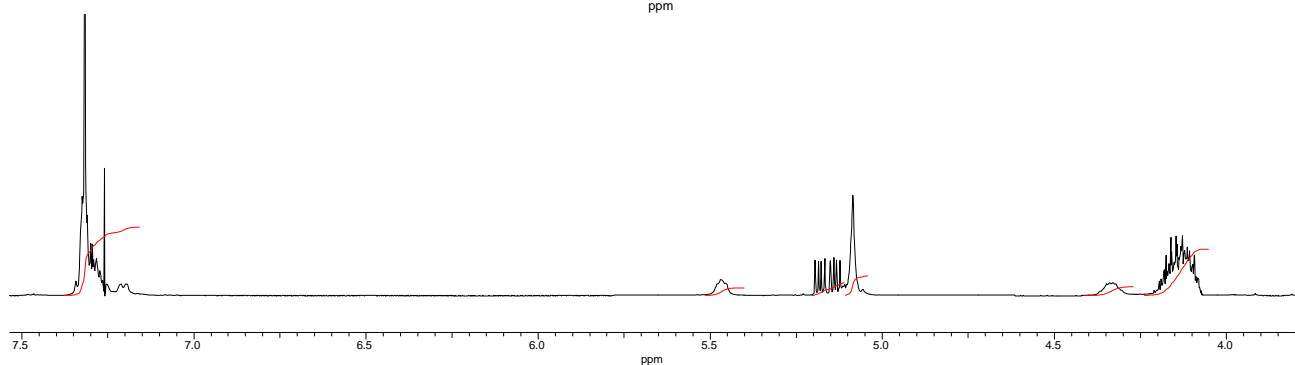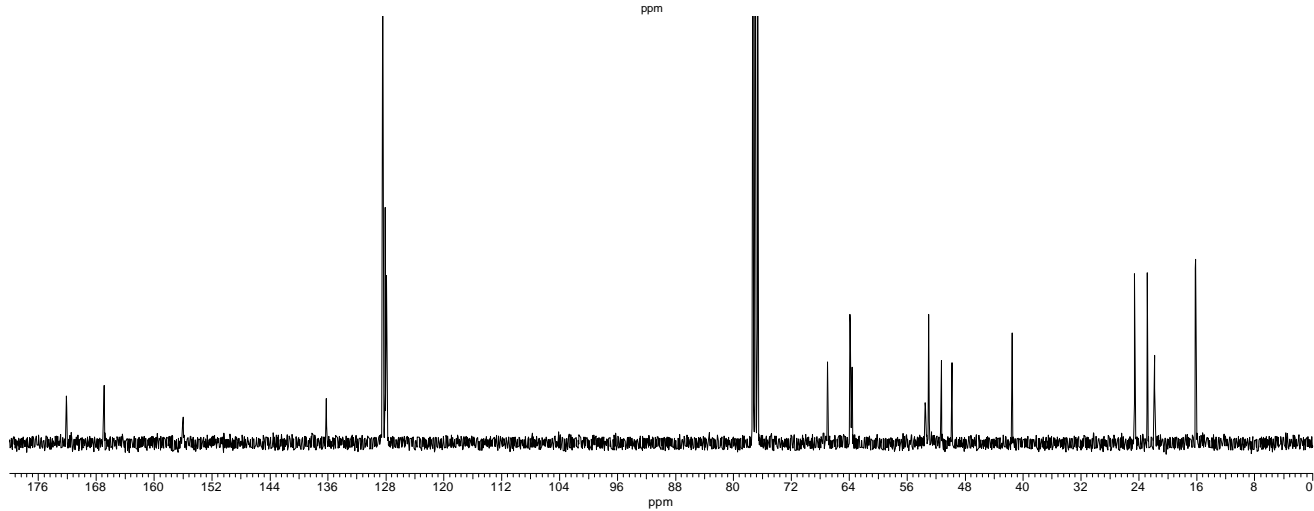

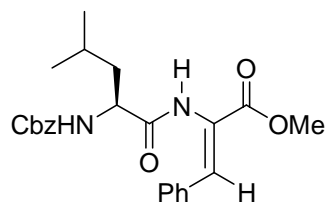

**13**

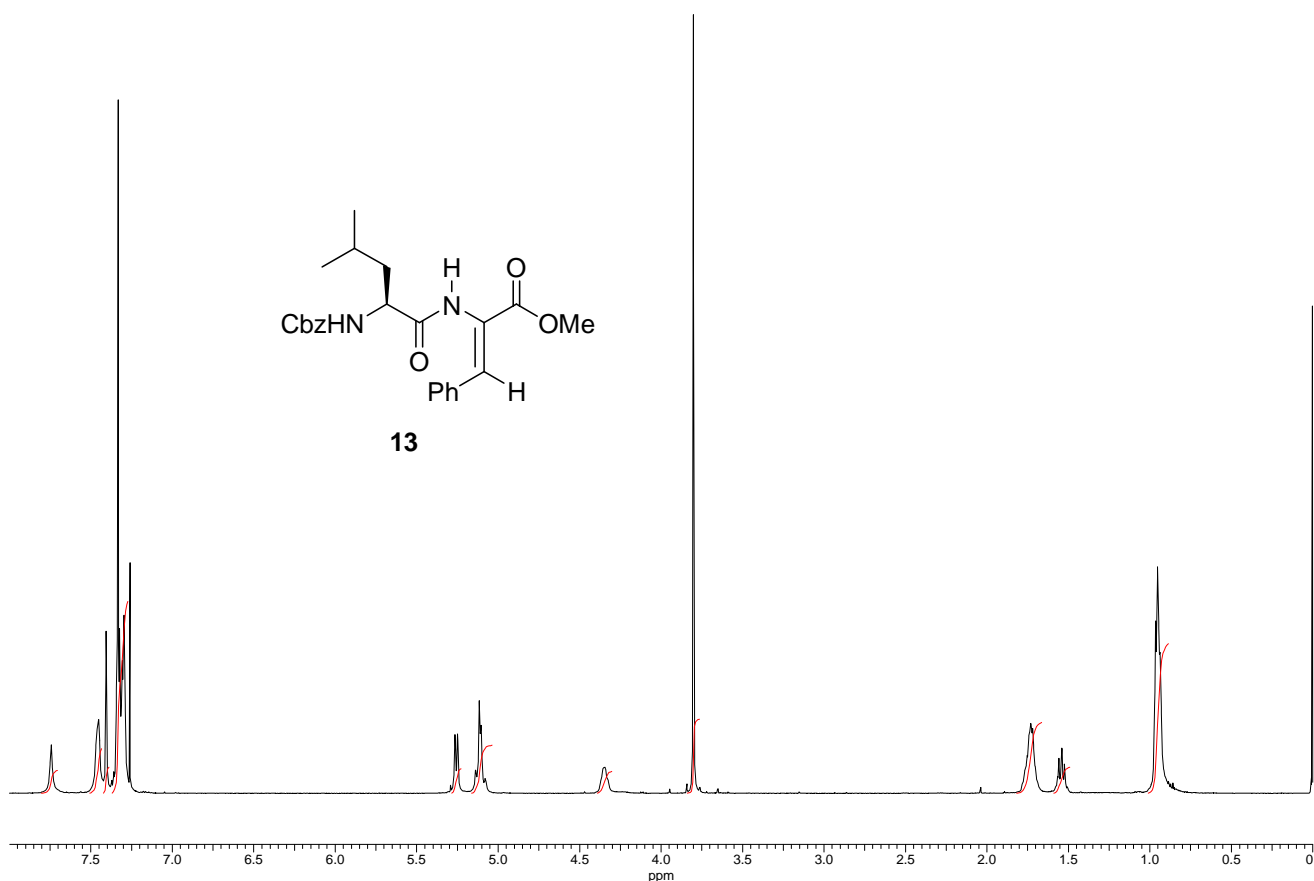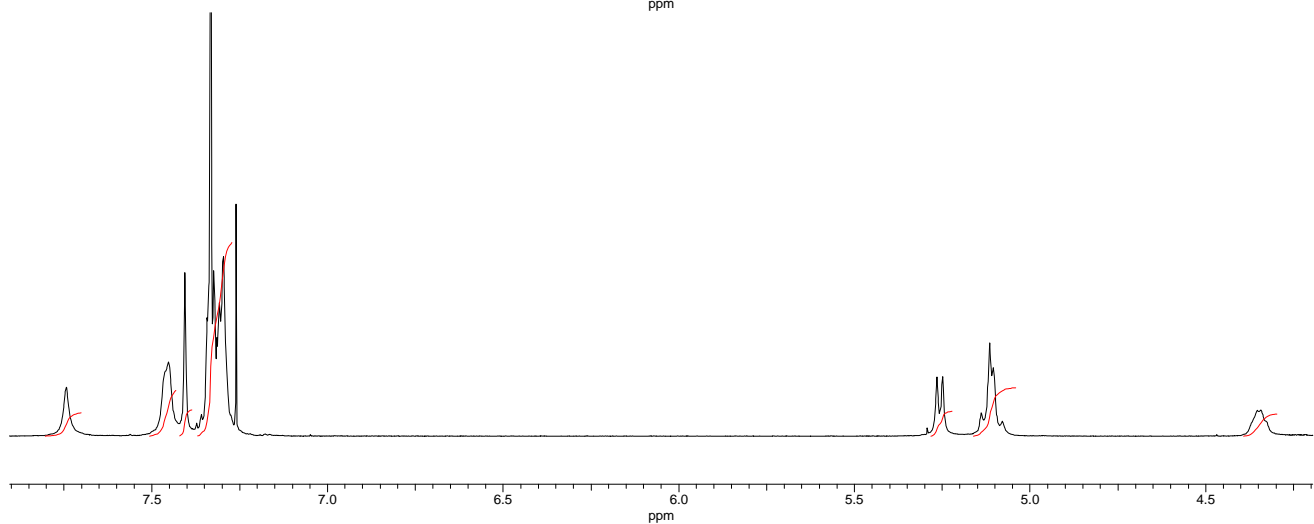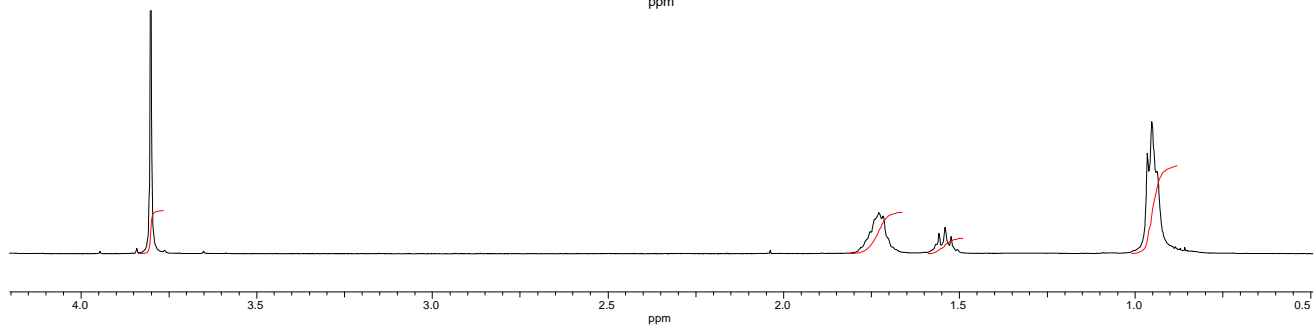

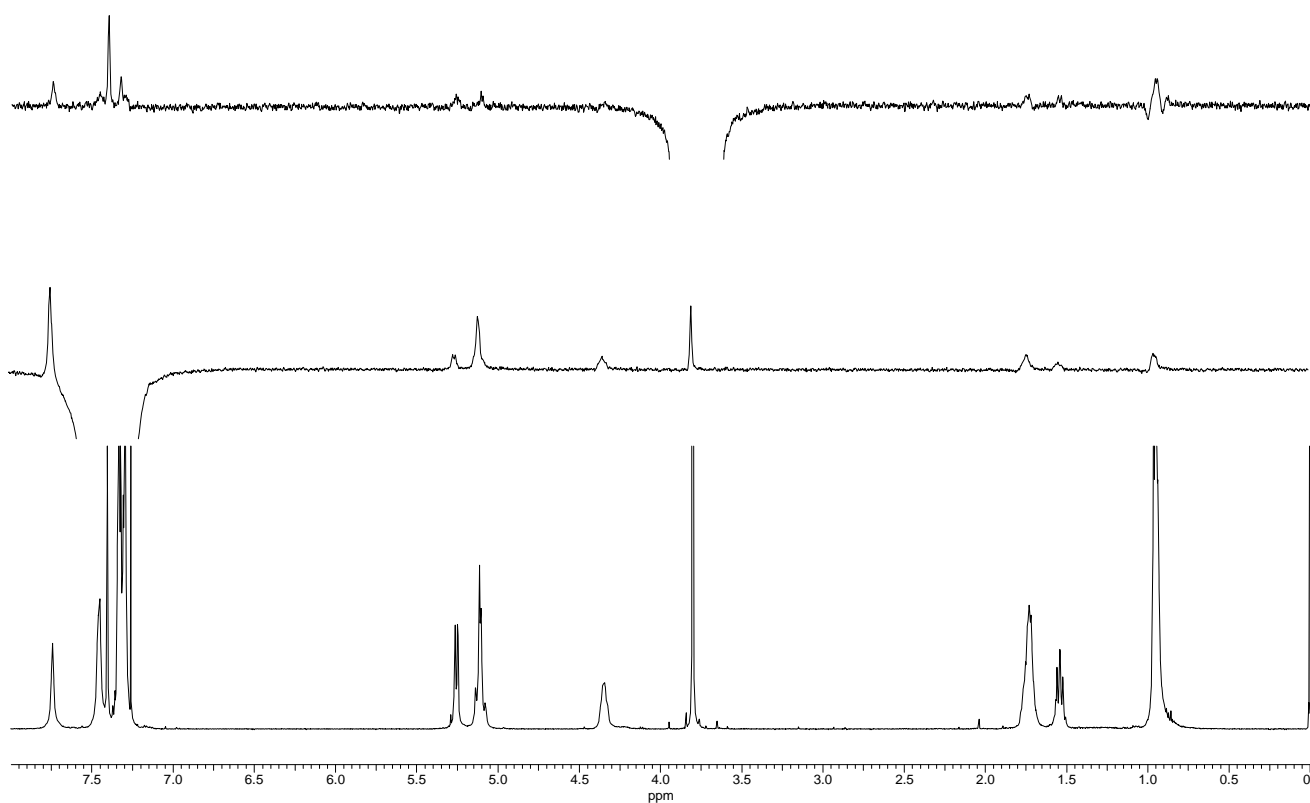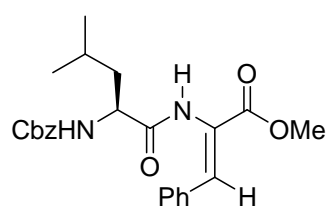

**13**

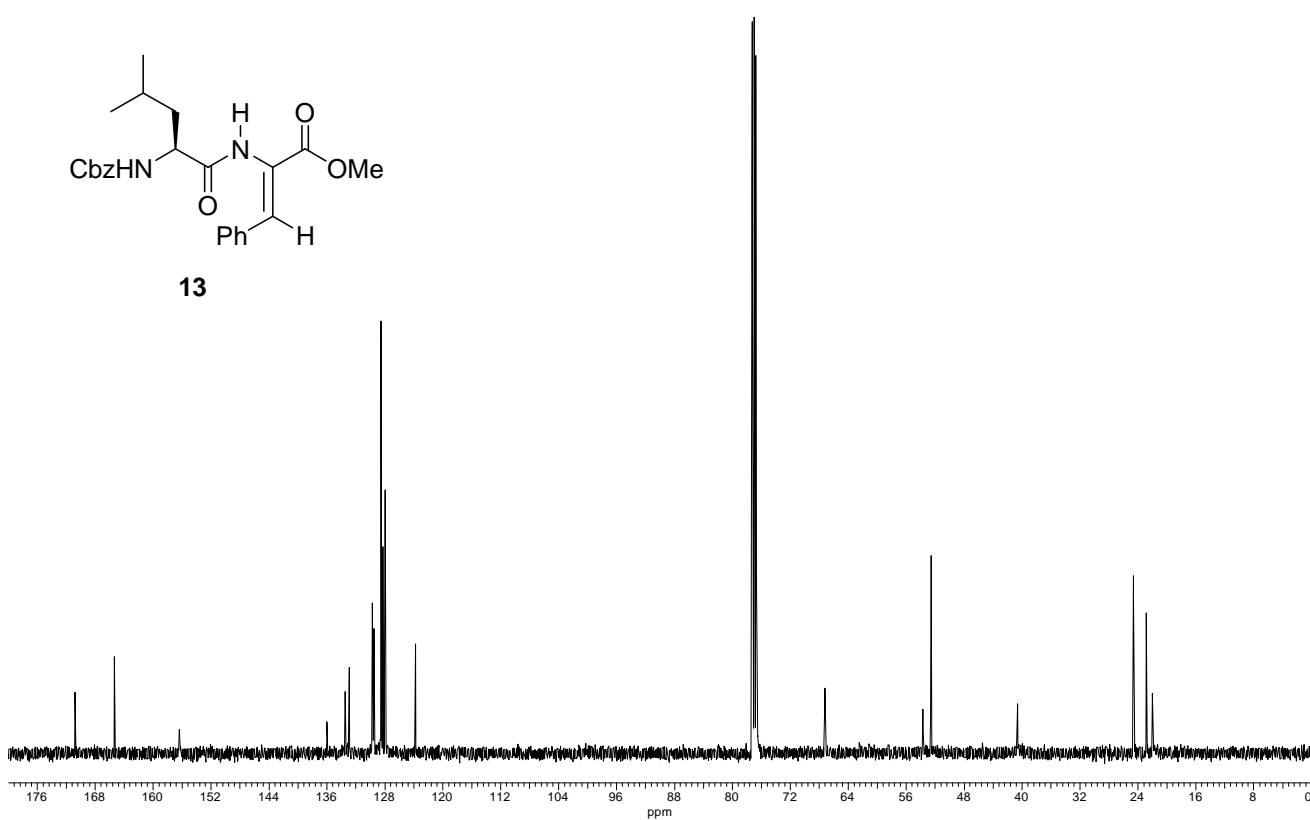

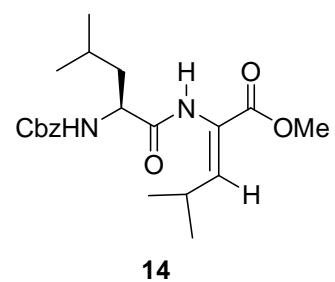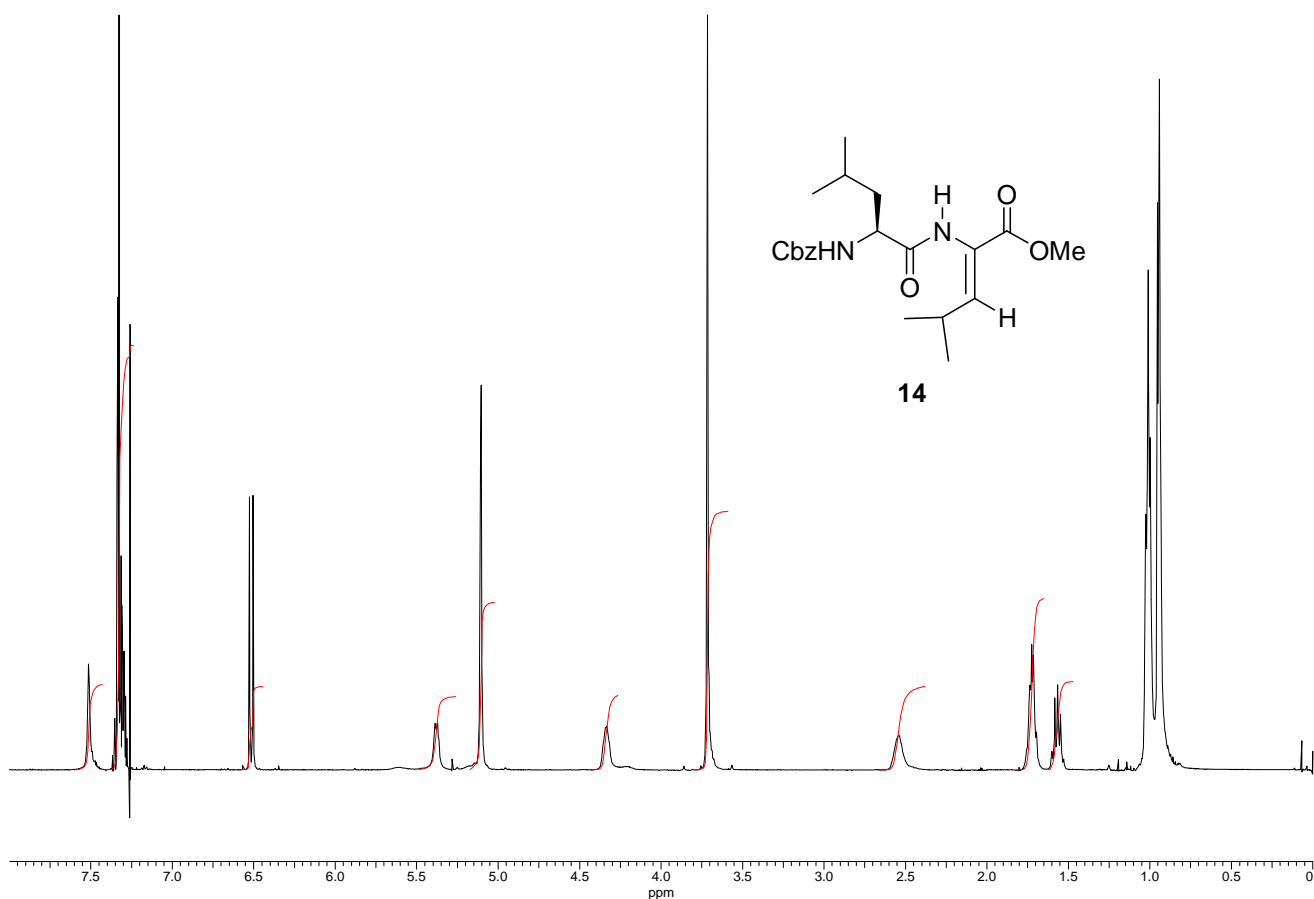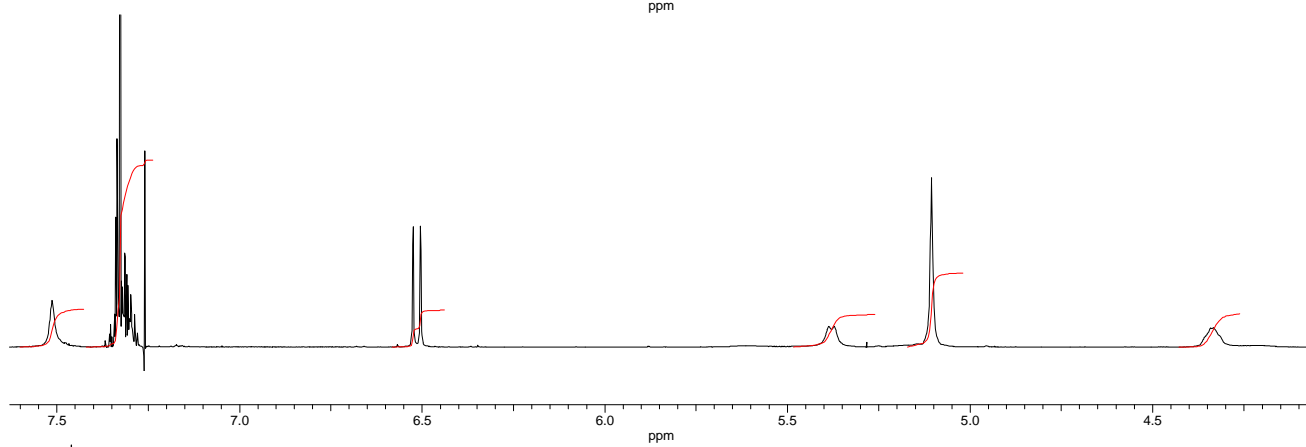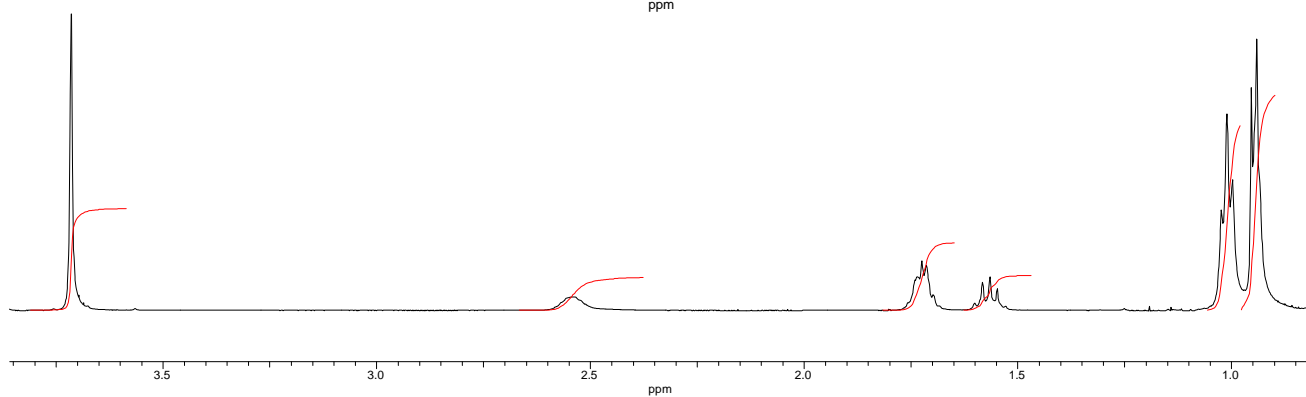

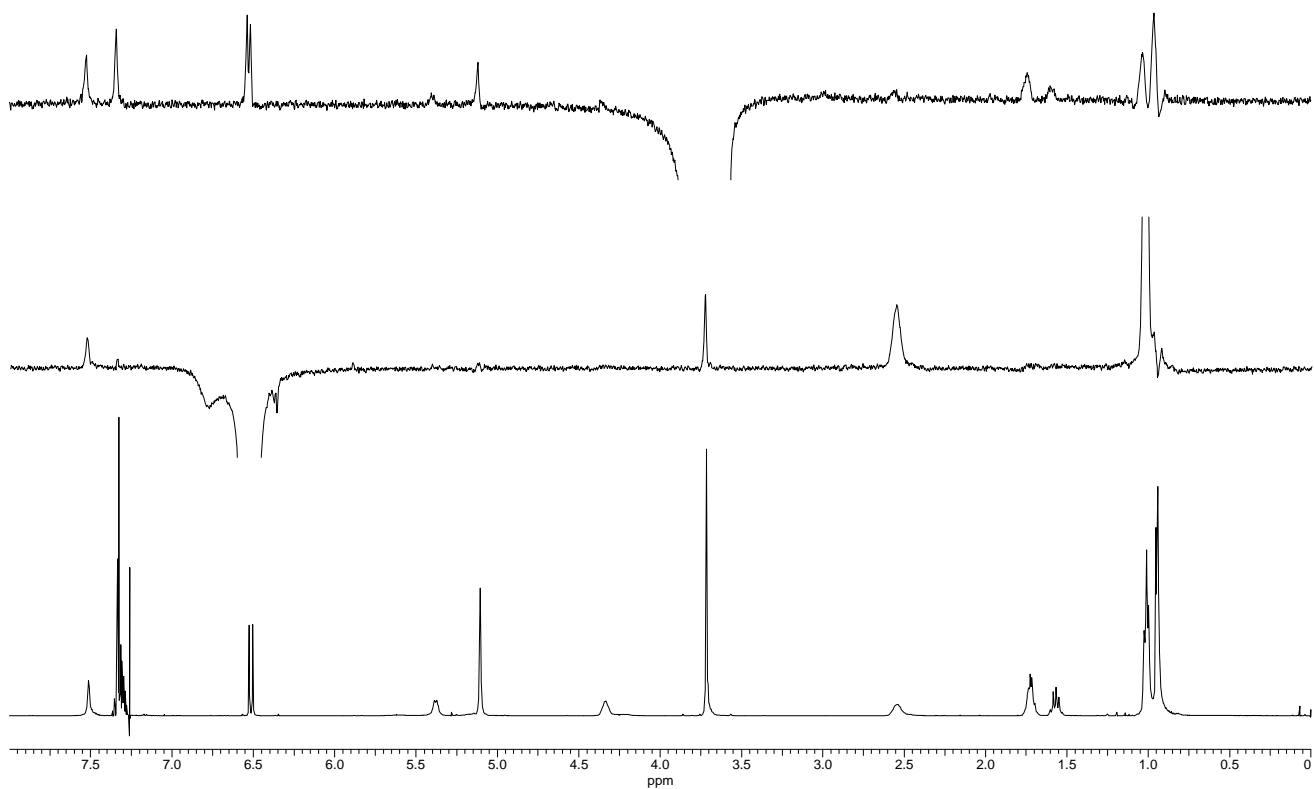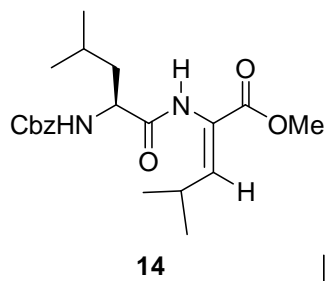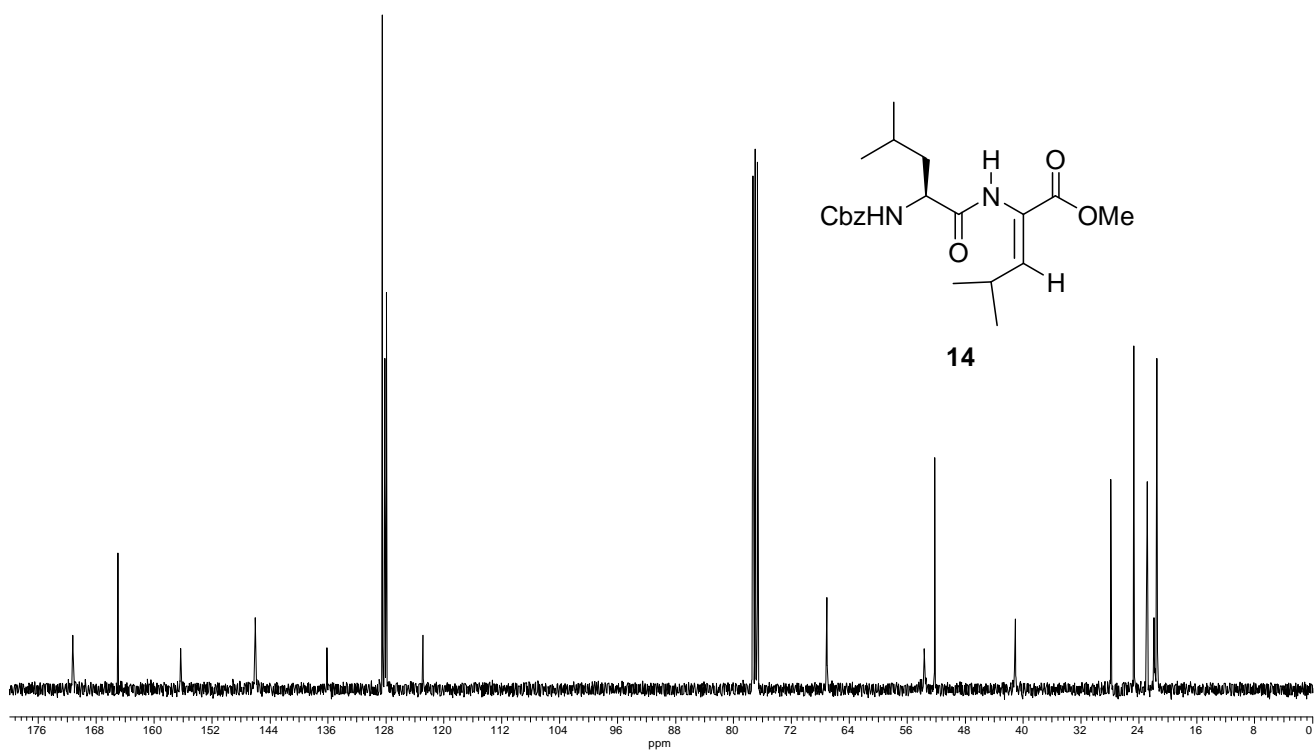



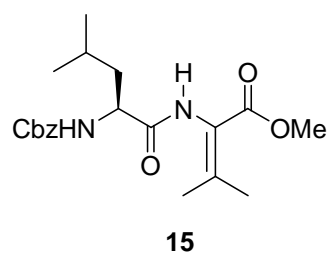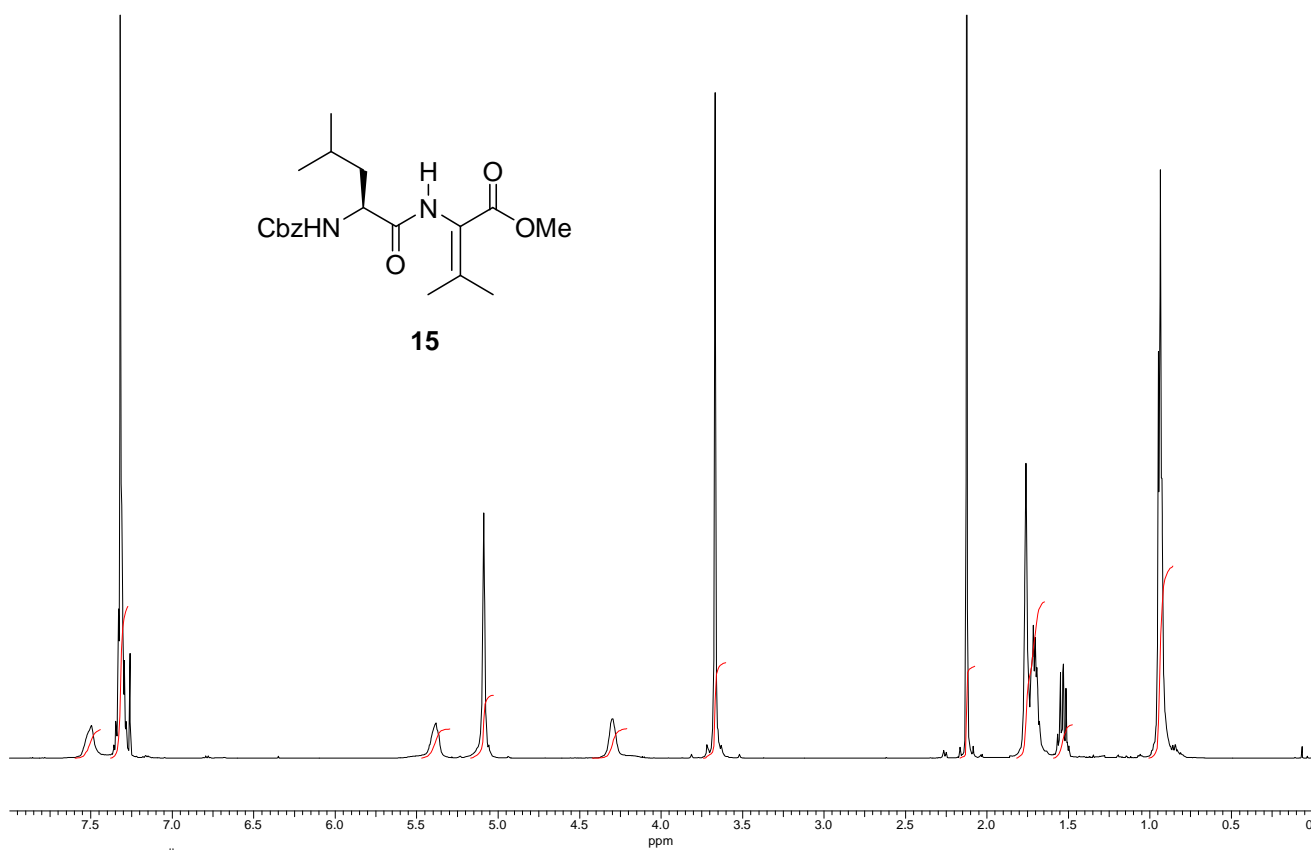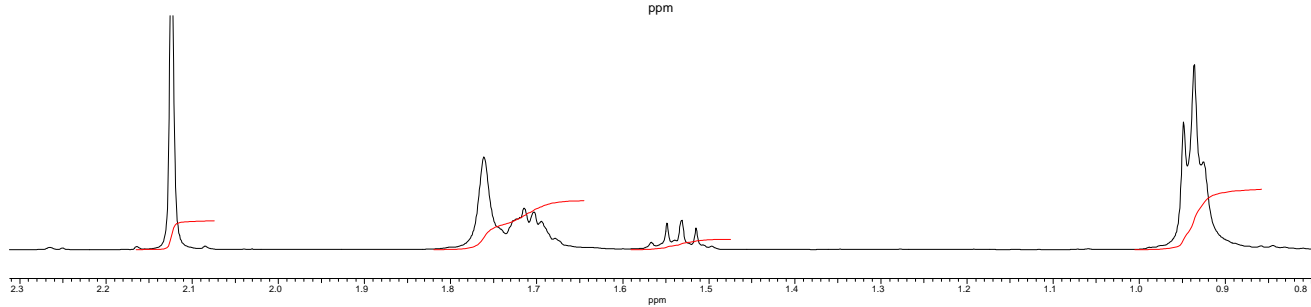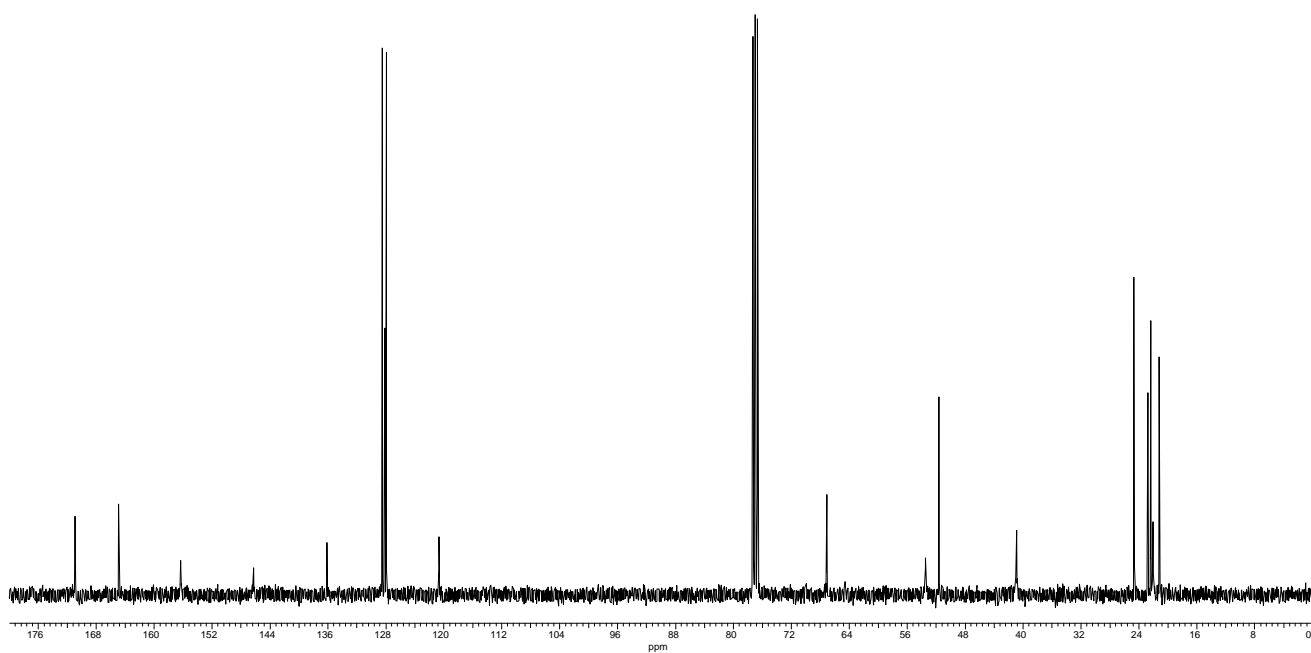

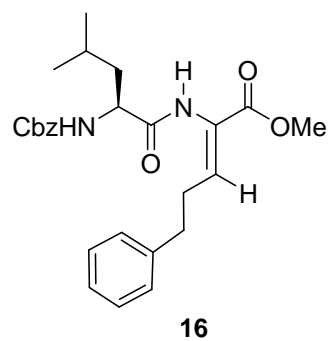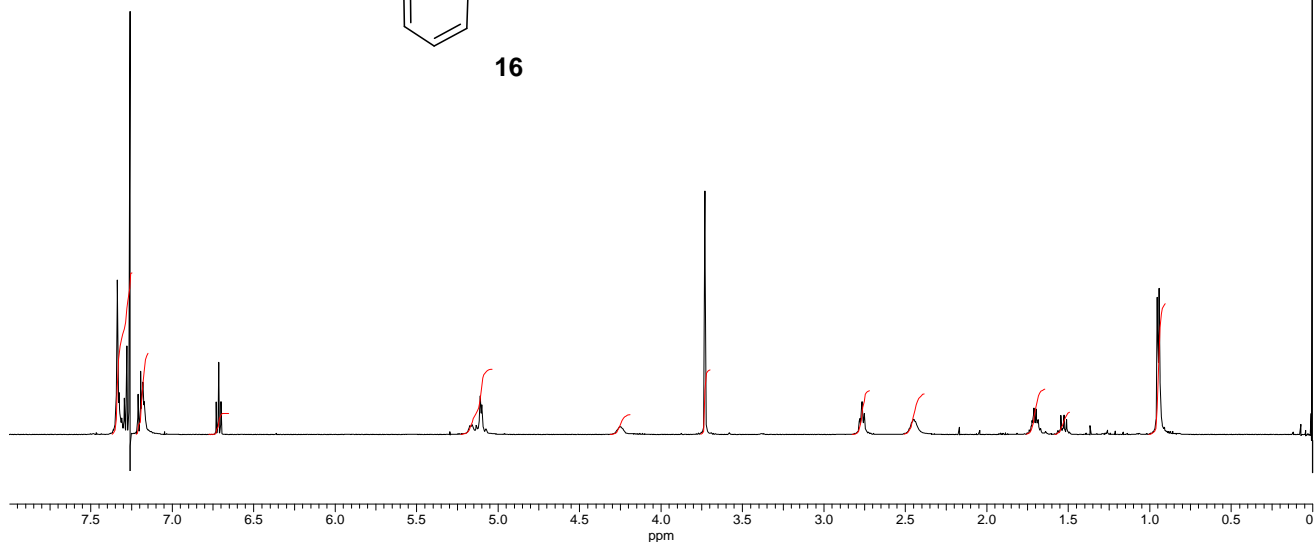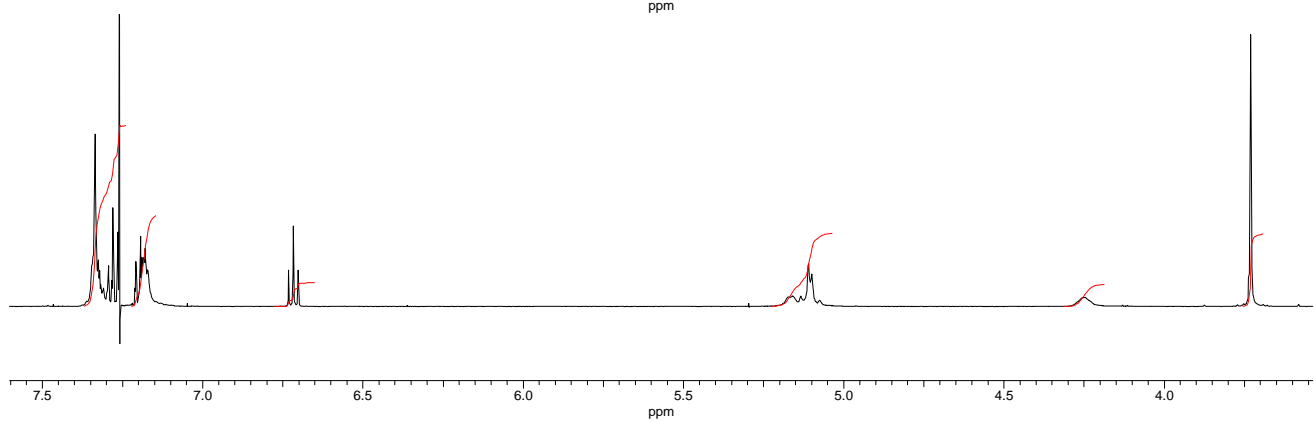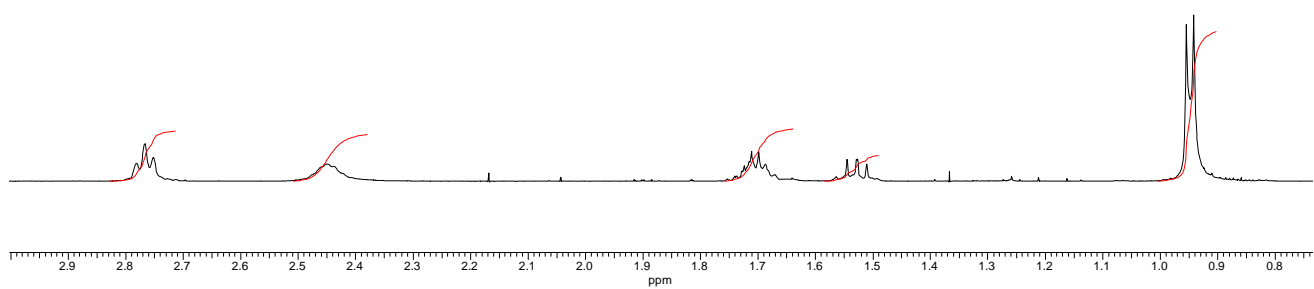

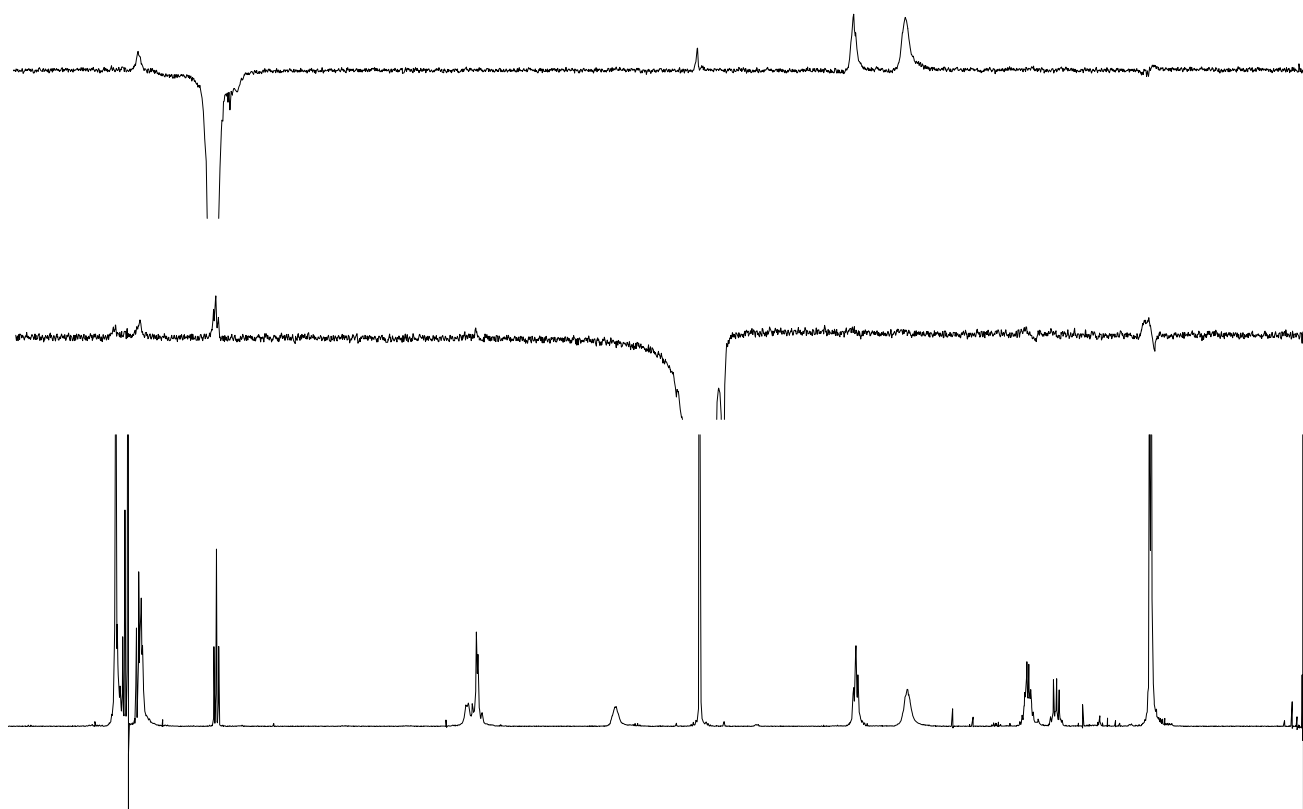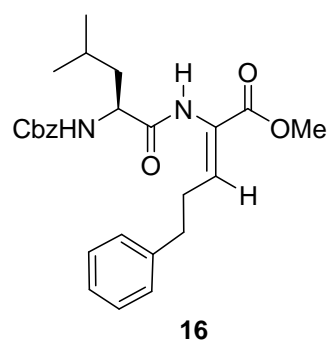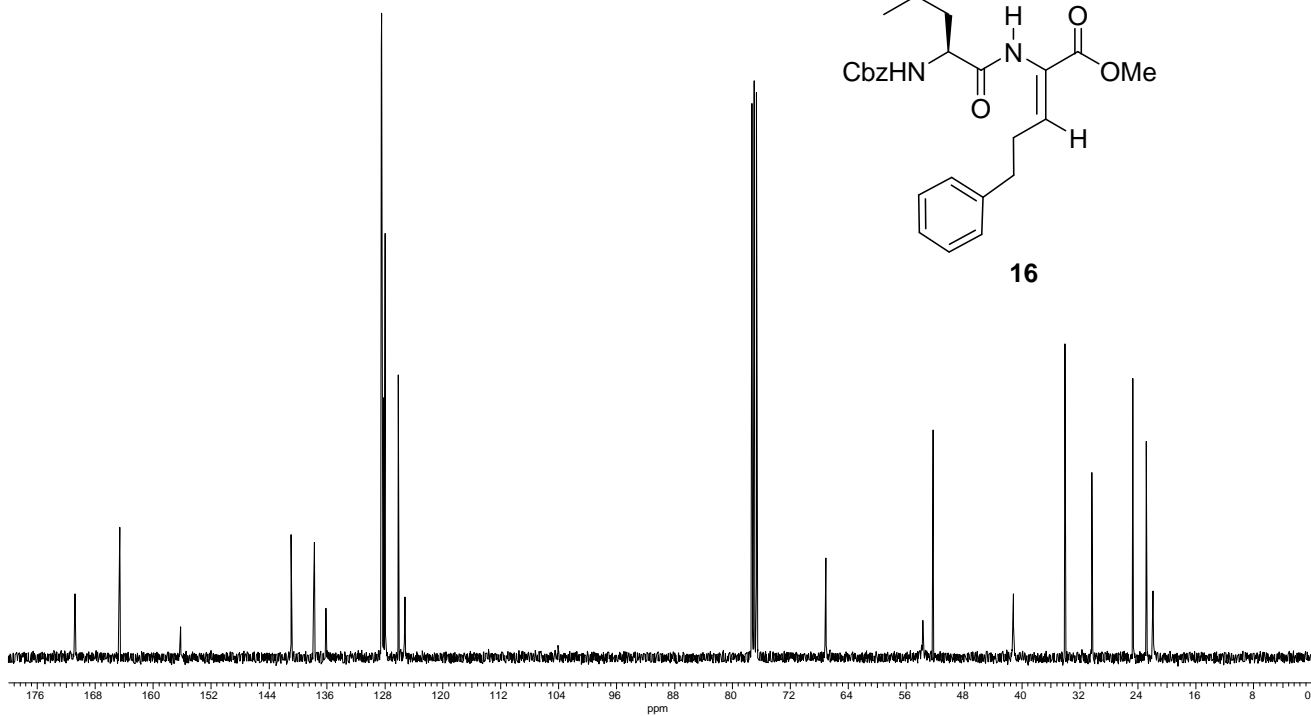

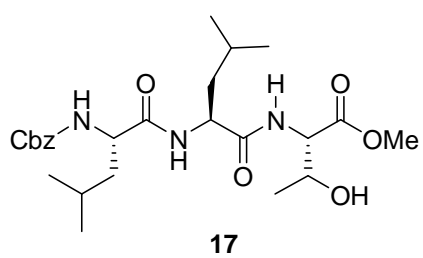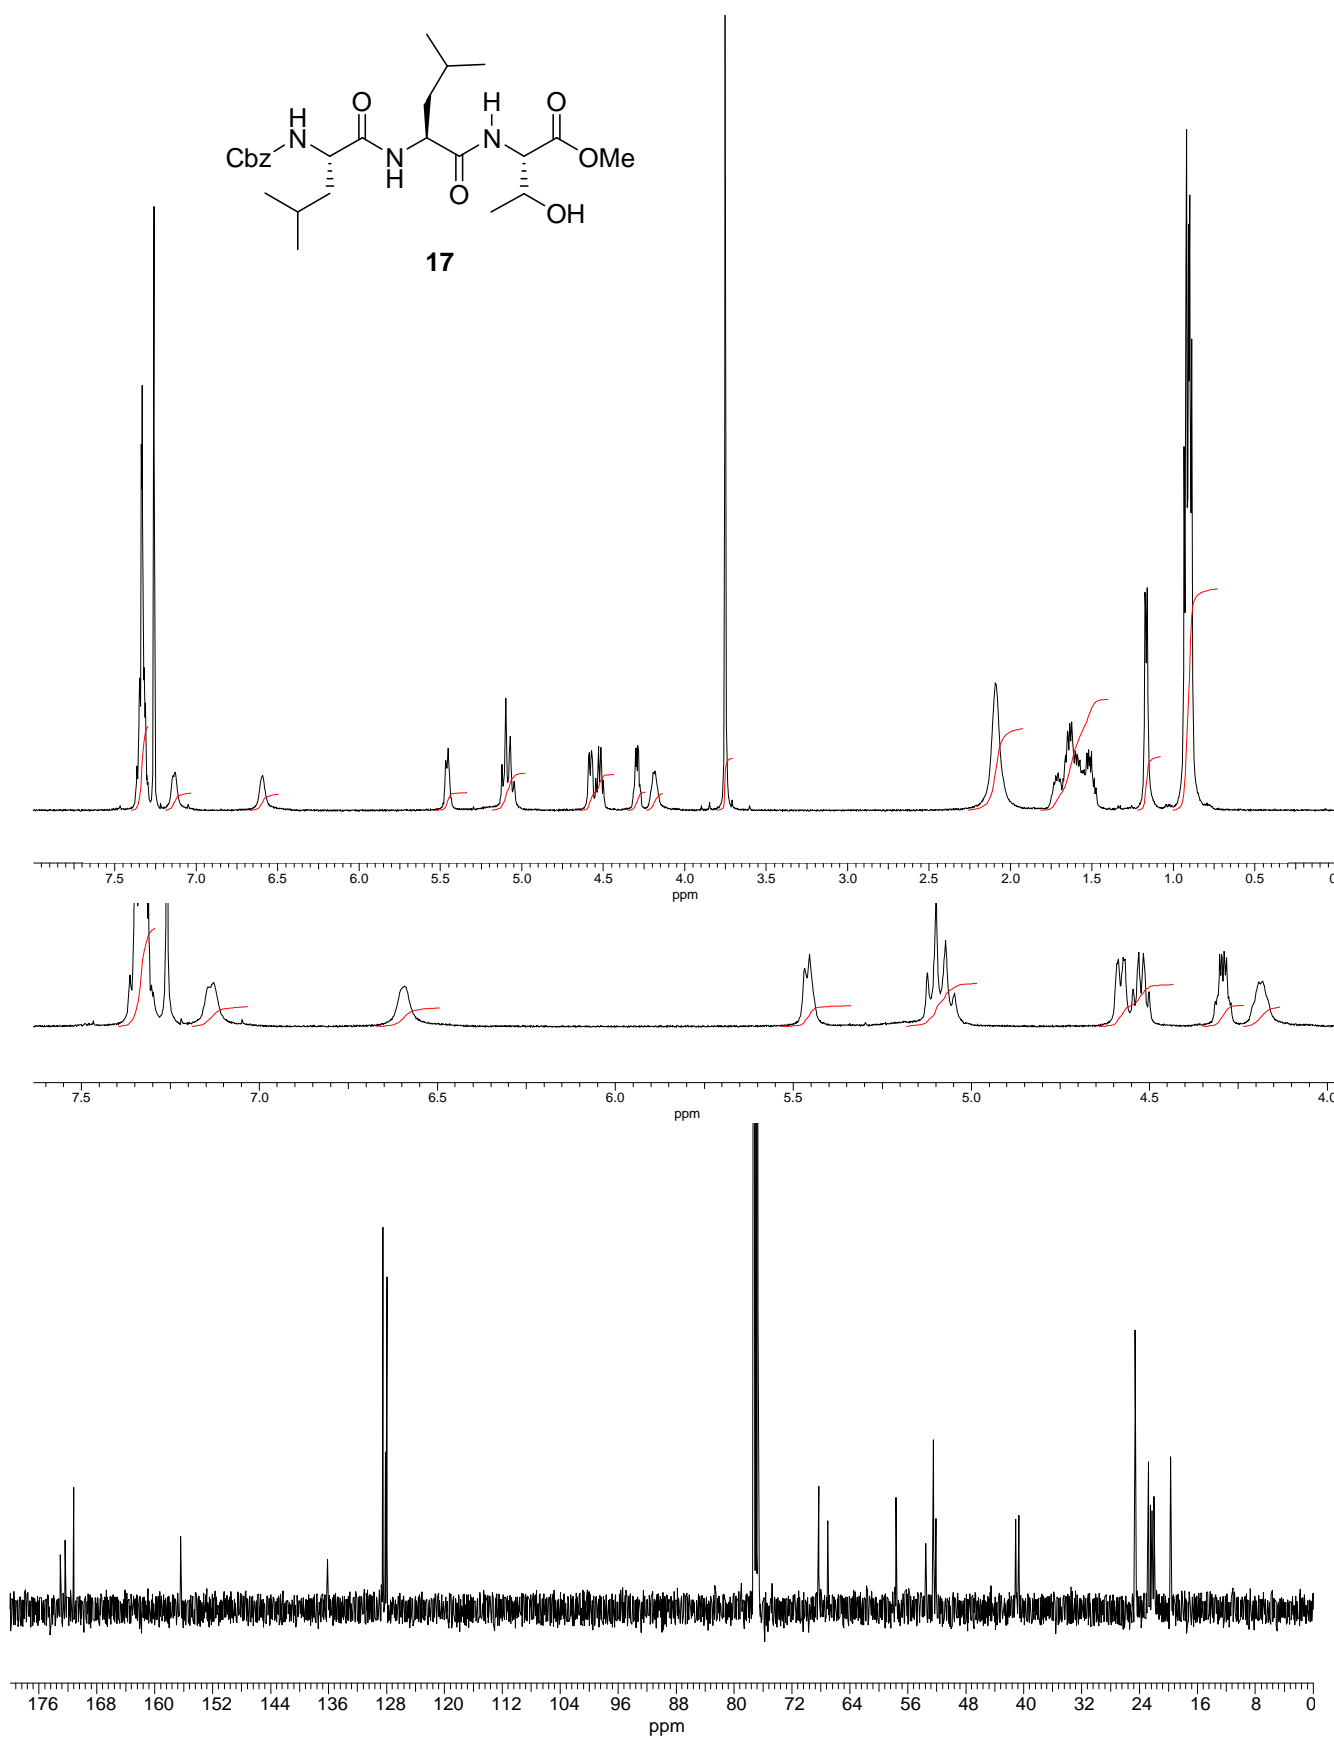

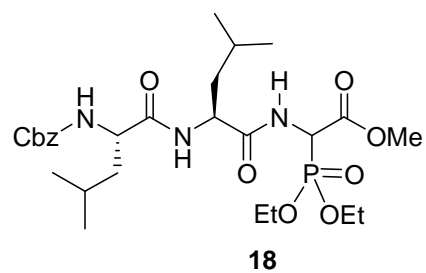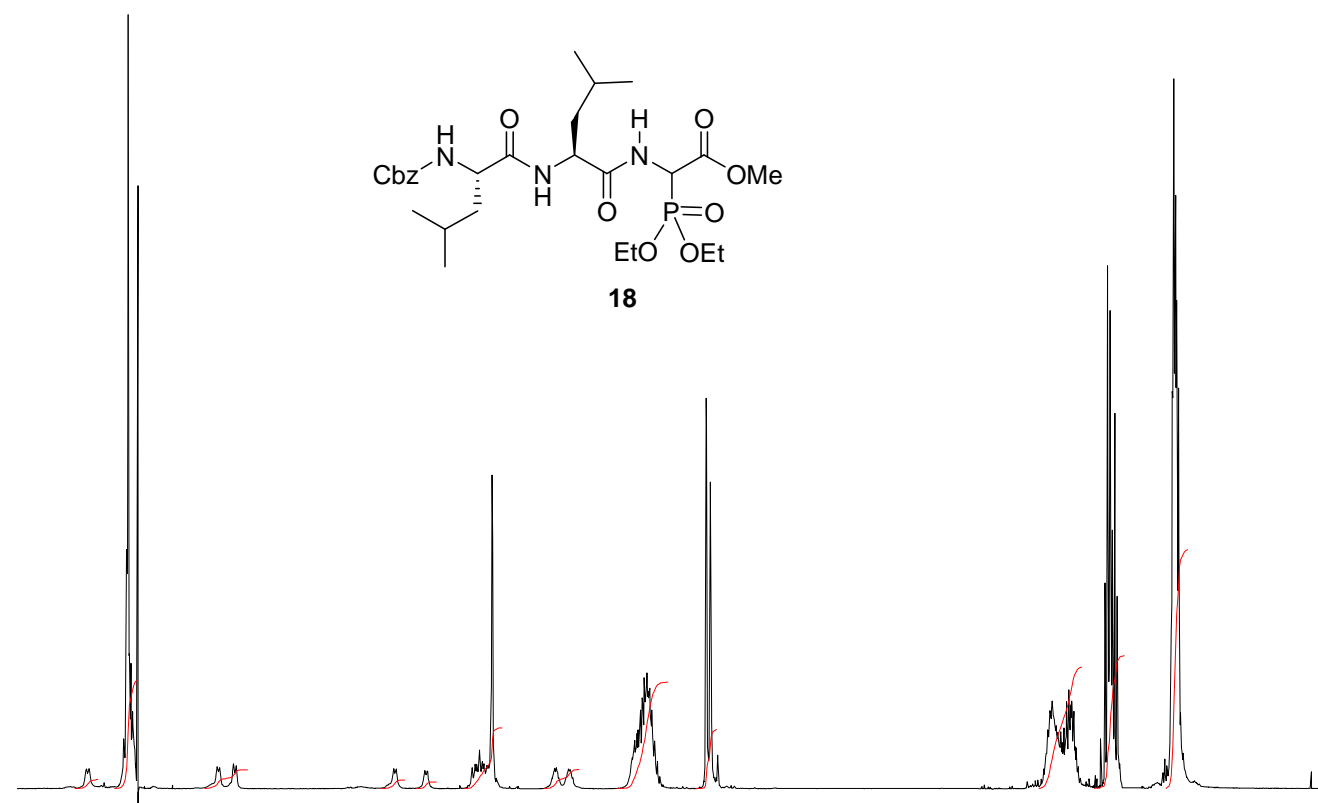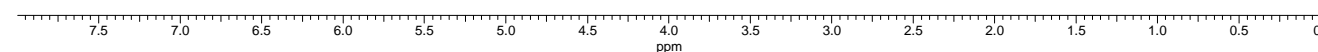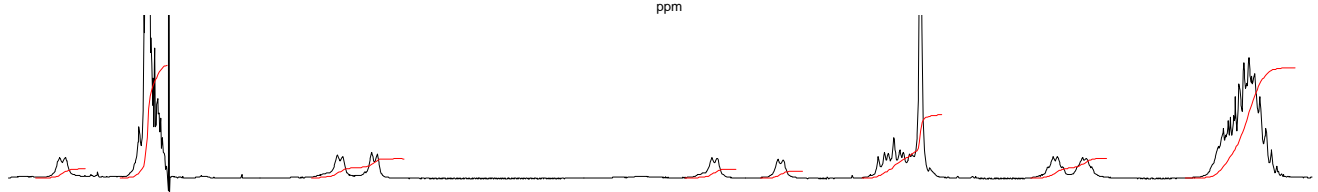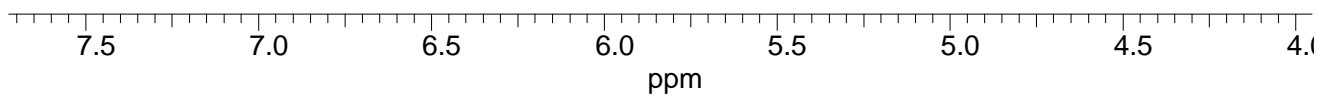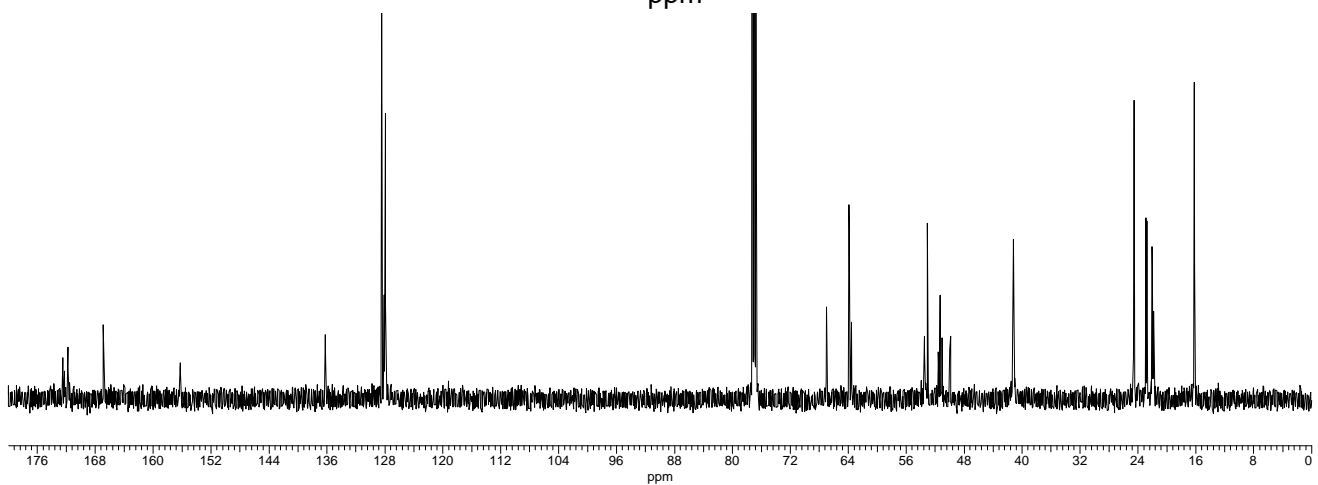

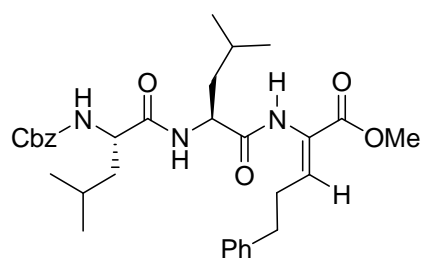

**19**

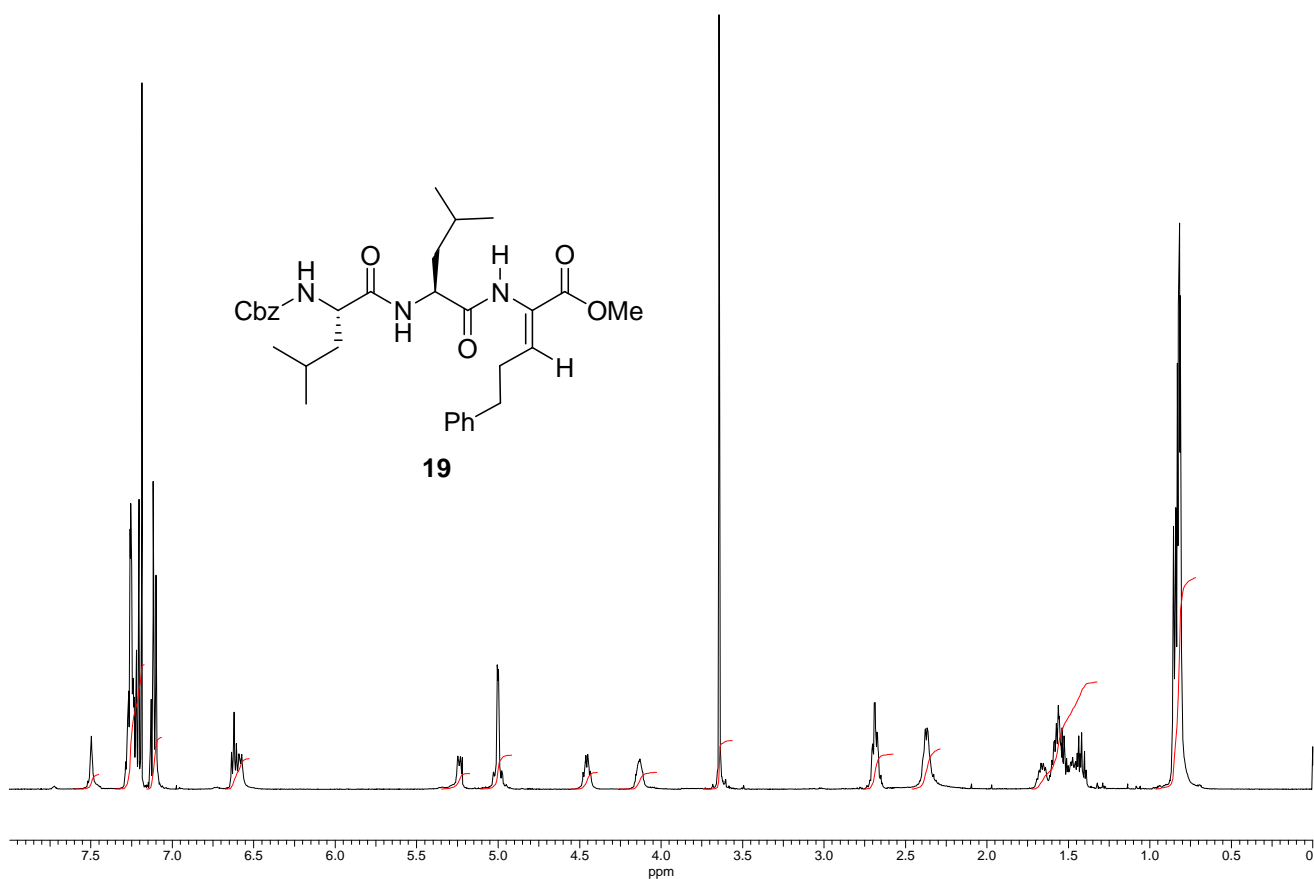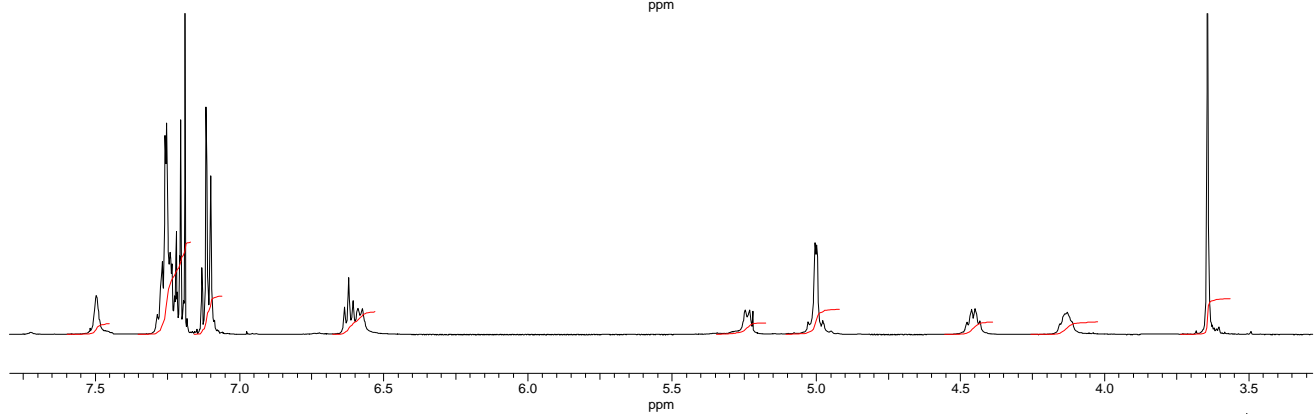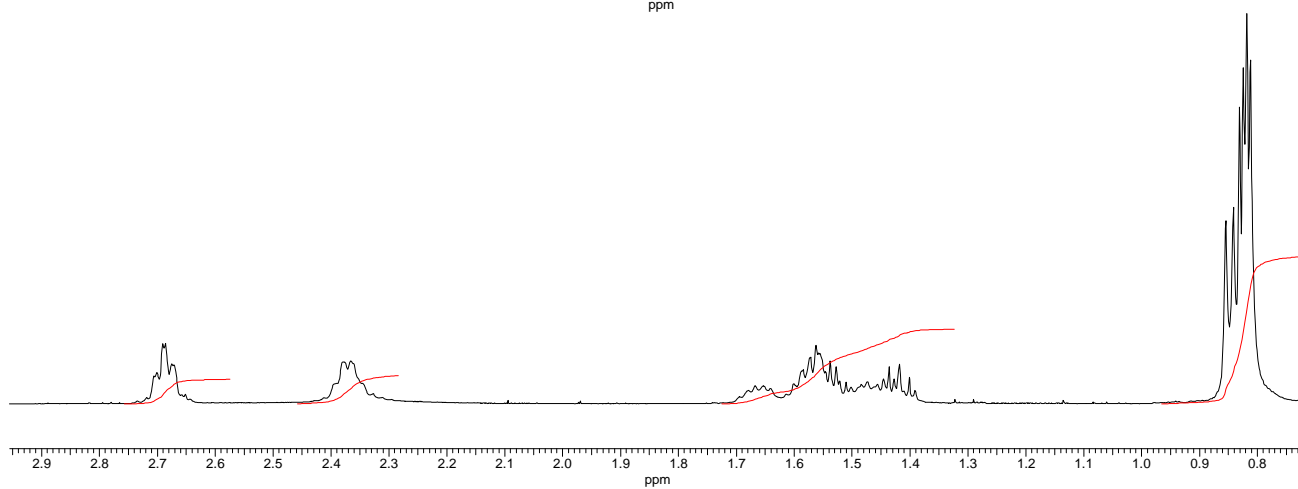



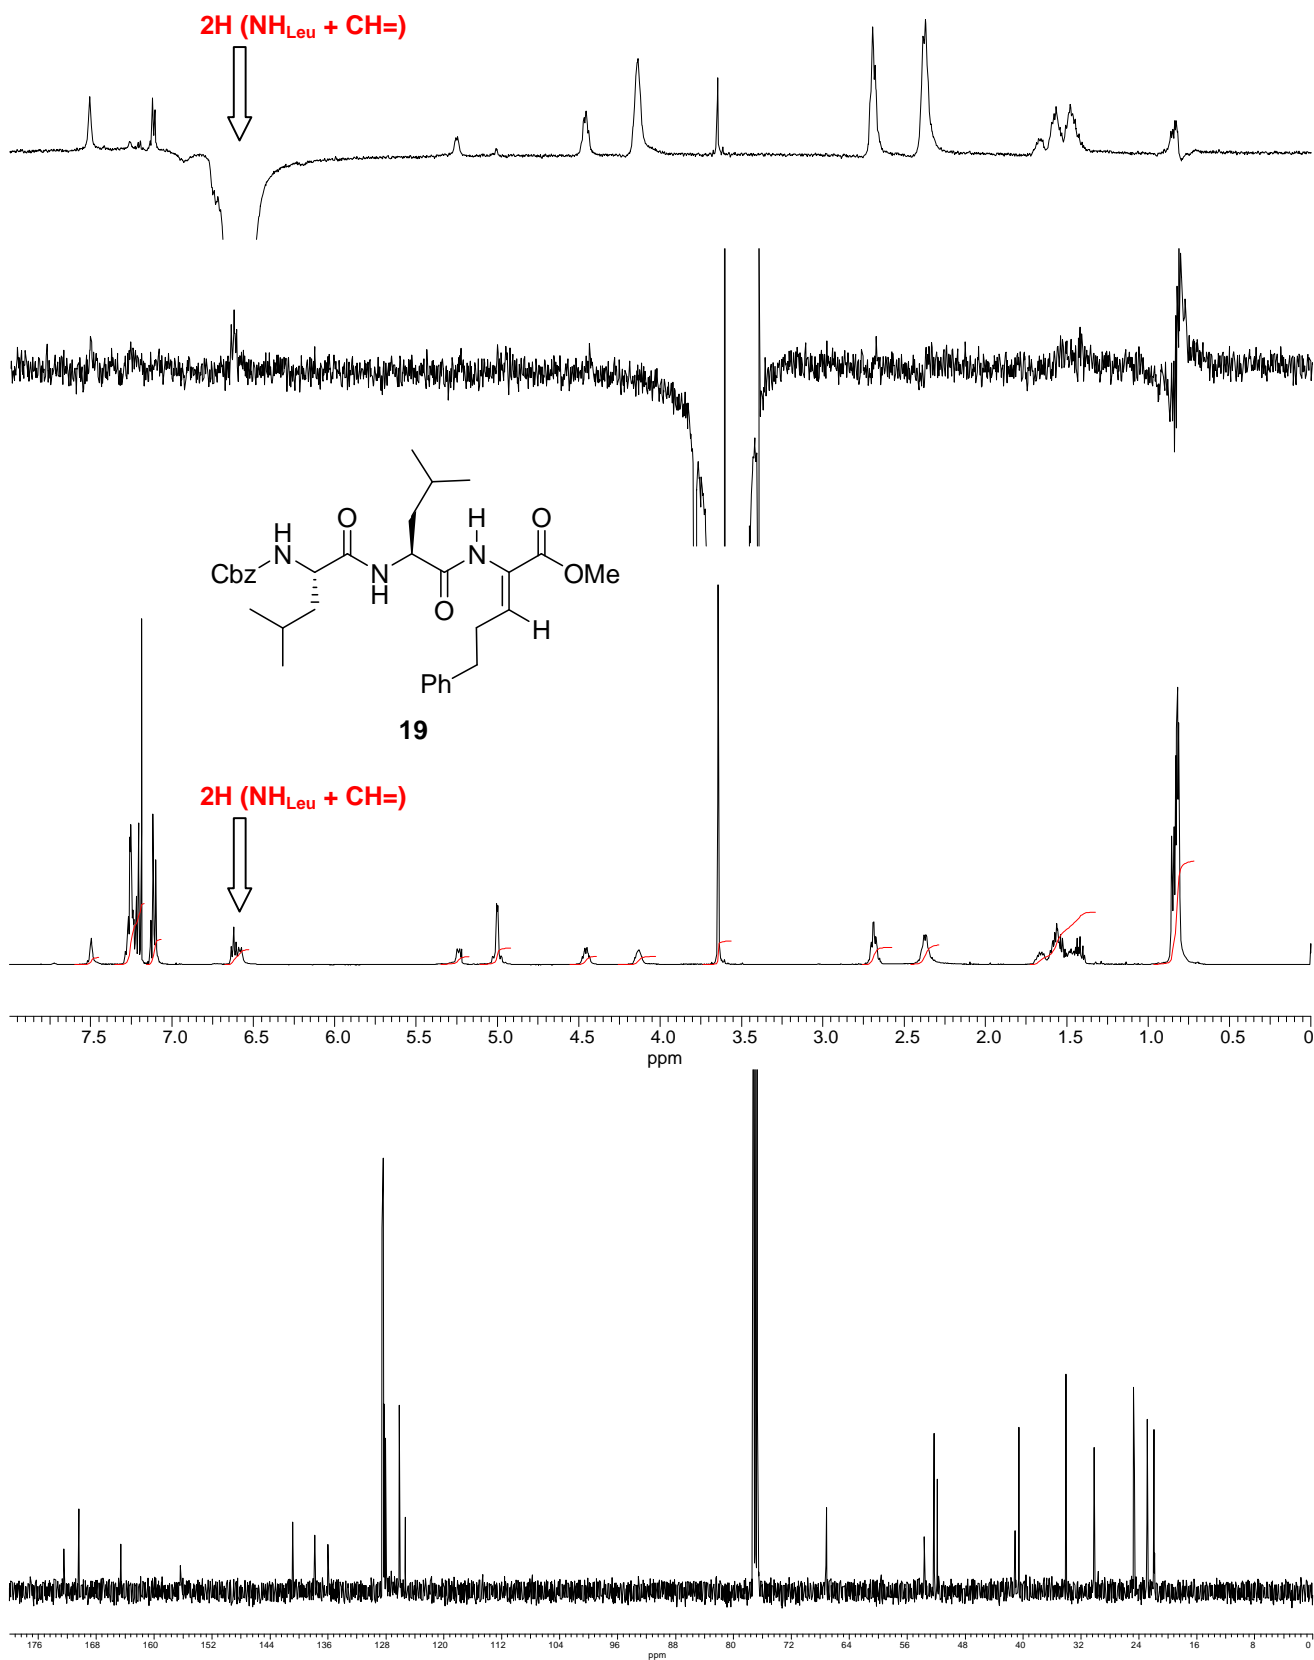

Supplement: Supplementary file 1 [file 4146682]
